# Supplementary material for: Photo-editable macromolecular information
Source: PubMed Central journal article supplement (PMC6726599; doi:10.1038/s41467-019-11566-2), 2019-09-04
Supplement: 41467_2019_11566_MOESM1_ESM.pdf [file 41467_2019_11566_MOESM1_ESM.pdf]

## Supplementary Figures.

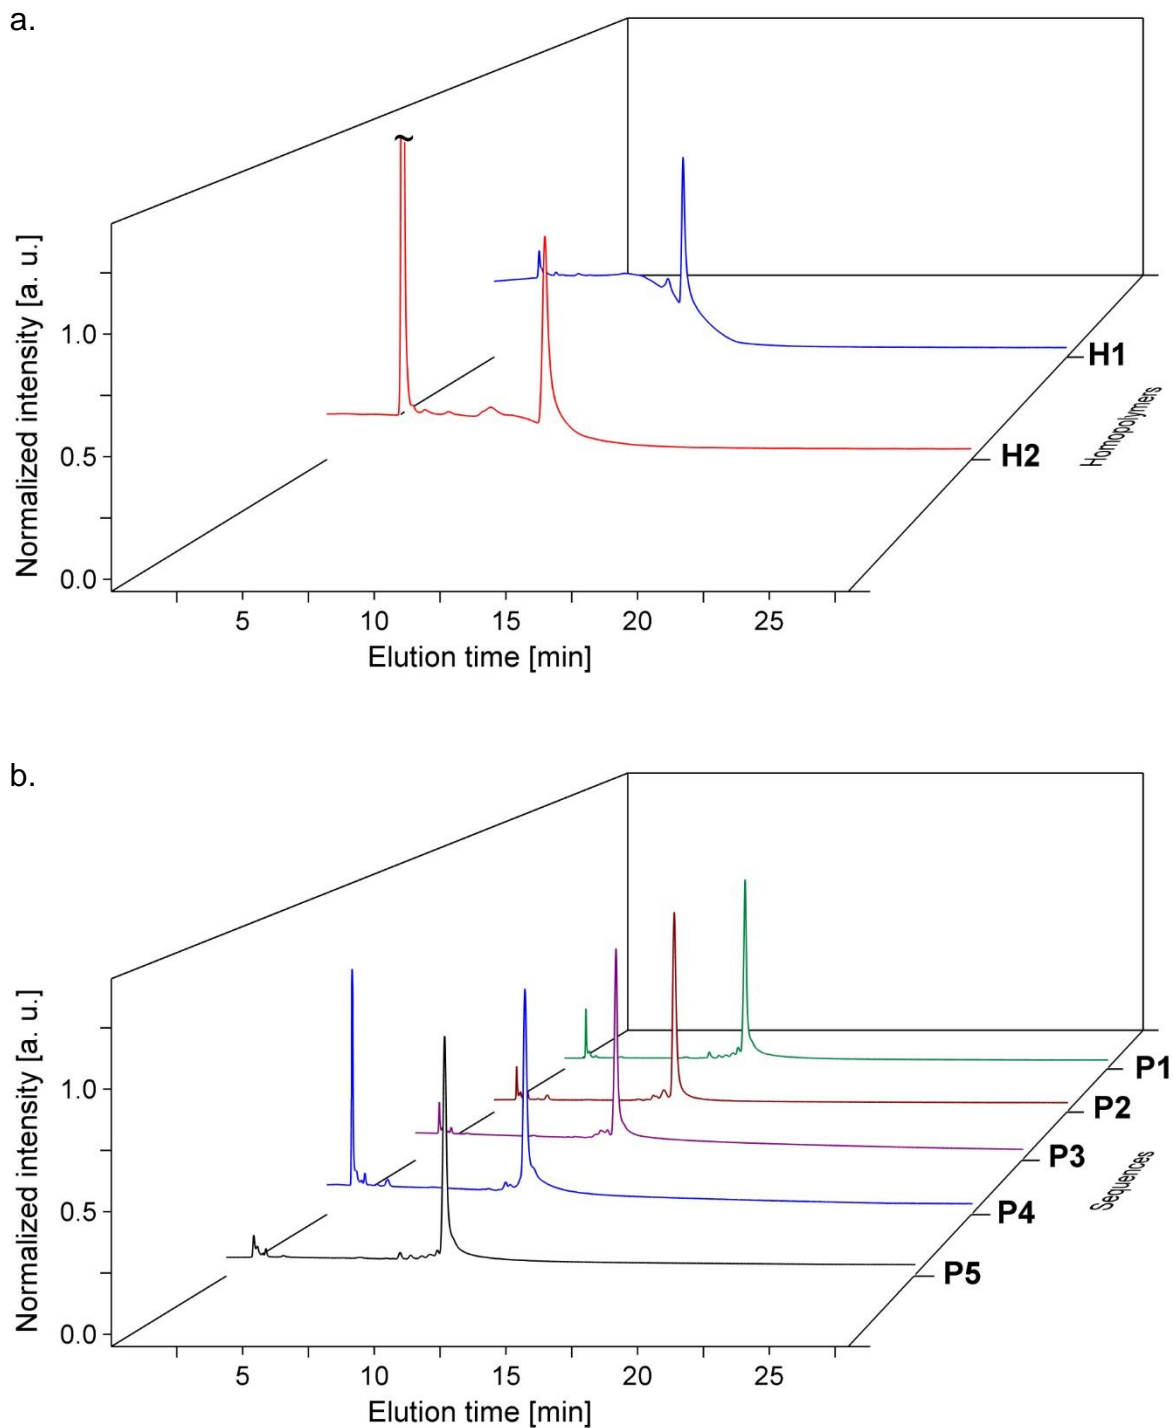

**Supplementary Figure 1.** IE-HPLC traces measured for (a) homopolymers **H1-H2** and (b) copolymers **P1-P5**. The chromatograms are recorded at  $\lambda = 260$  nm. Experimental conditions: phase A: 10 % MeCN 20 % 2M  $\text{NH}_3$  in water, phase B: 2.5 M NaCl in water; gradient: 0-3 min 5 % B, 3-23 min 5 % B-30 % B, 23-28 min 30 % B, 28-35 min 30%  $\rightarrow$  5 % B; flow rate: 1 mL $\cdot$ min $^{-1}$ .

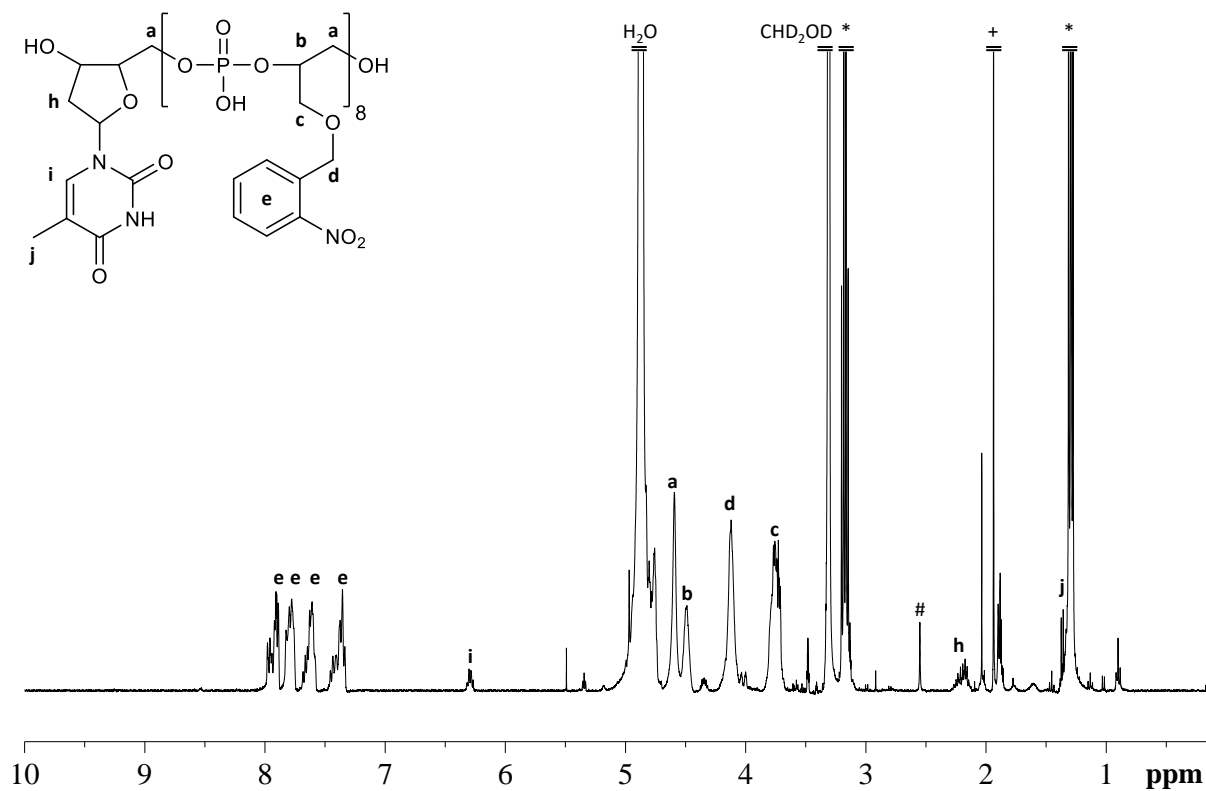

**Supplementary Figure 2.** <sup>1</sup>H NMR spectrum recorded at RT in CD<sub>3</sub>OD for homopolymer **H1**. The star symbols indicate signals of triethylammonium counterions. (#) Methylamine, (+) acetonitrile.

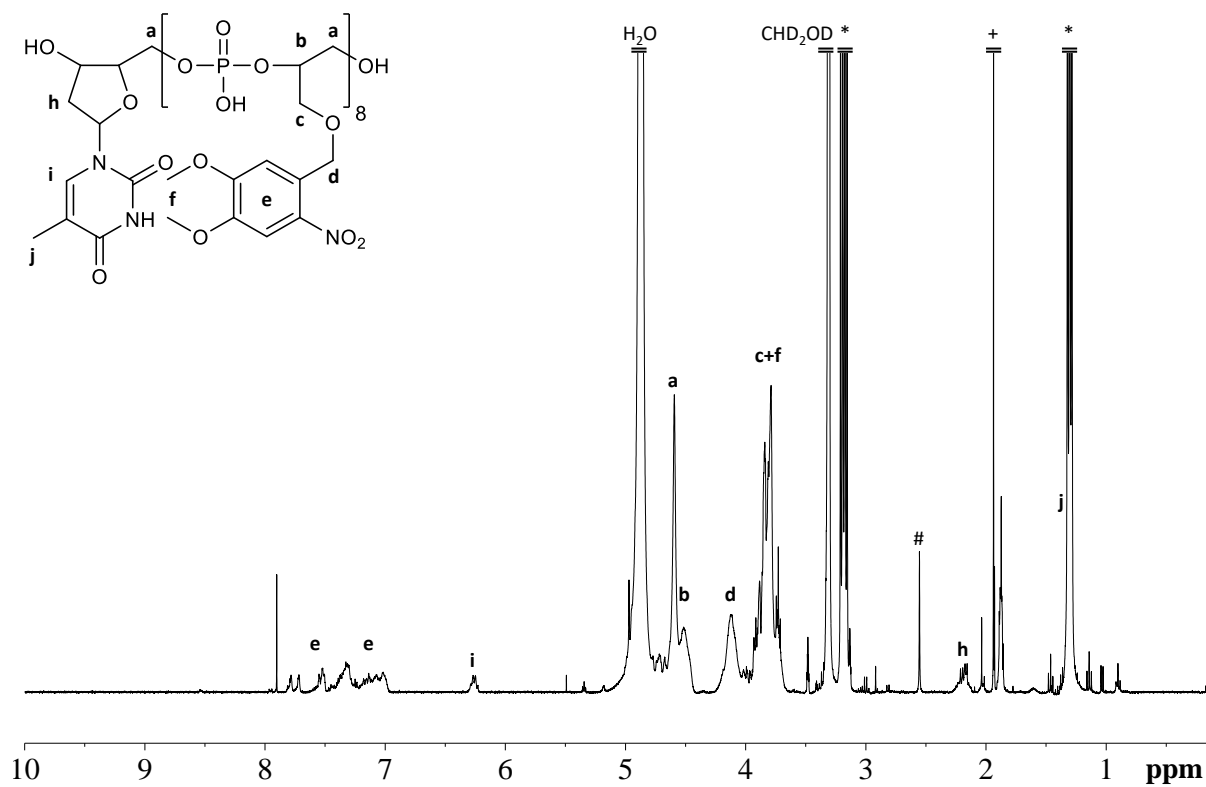

**Supplementary Figure 3.** <sup>1</sup>H NMR spectrum recorded at RT in CD<sub>3</sub>OD for homopolymer **H2**. The star symbols indicate signals of triethylammonium counterions. (#) Methylamine, (+) acetonitrile.

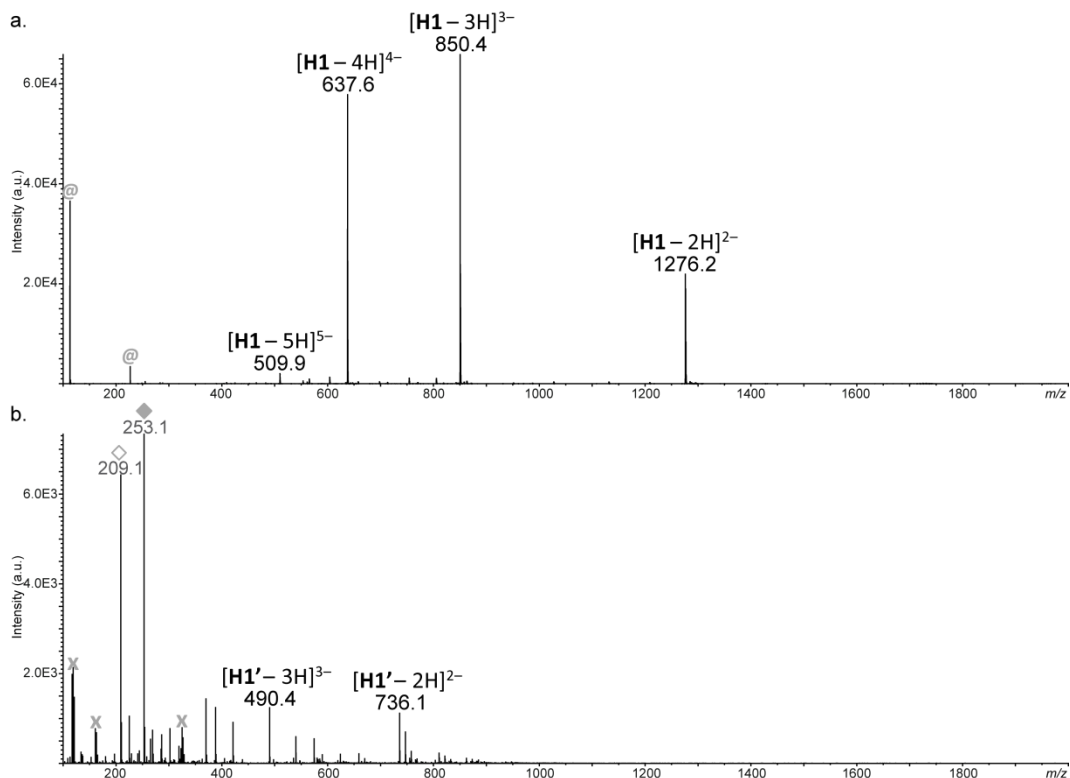

**Supplementary Figure 4.** ESI HRMS spectra recorded for (a) homopolymer **H1** before irradiation and (b) the resulting polymer **H1'** after photo-exposure. Grey symbols designate clusters of trifluoroacetic acid (@), of trichloroacetic acid (x) or photo-deprotection by-products (diamond).

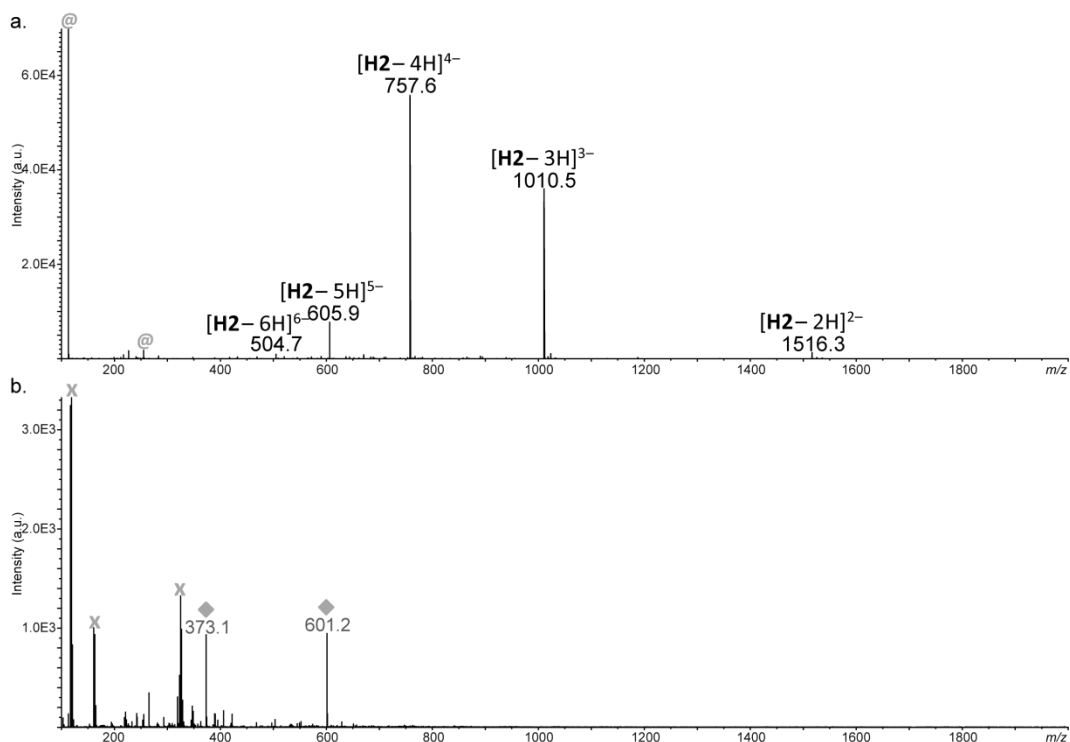

**Supplementary Figure 5.** ESI HRMS spectra recorded for (a) homopolymer **H2** before irradiation and (b) the resulting polymer **H2'** after photo-exposure. Grey symbols designate clusters of trifluoroacetic acid (@), of trichloroacetic acid (x) or photo-deprotection by-products (diamond).

## Supplementary discussion.

**Interpretation of the photo-deprotection by-products detected by ESI HRMS.** The peaks indicated by filled grey diamonds in ESI HRMS spectra of photo-exposed samples correspond to photo-deprotection by-products. As indicated in Fig. 1 of the main manuscript, nitrosobenzaldehyde intermediates are usually formed upon *o*-nitrobenzyl and *o*-nitroveratryl photocleavage.<sup>1</sup> However, it has been reported that these intermediates can further photo-dimerize into azobenzene diacid derivatives.<sup>2,3</sup> In the present photo-deprotection and analytical conditions, the formation of dimers containing carboxylic acid and aldehyde groups was observed,<sup>4</sup> as evidenced below in Supplementary Figures 6 and 7.

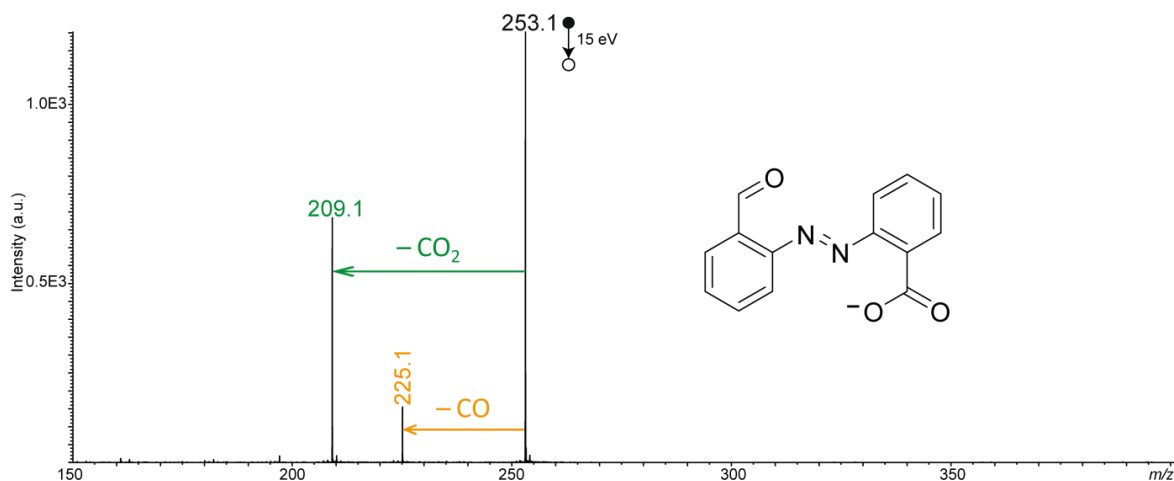

**Supplementary Figure 6.** MS/MS spectrum recorded for the photo-deprotection by-product observed at  $m/z$  253.1 ( $C_{14}H_9N_2O_3^-$ ,  $m/z_{th}$  253.0619,  $m/z_{exp}$  253.0614) after photo-irradiation of homopolymer **H1**, showing competitive losses of CO and CO<sub>2</sub> consistent with the proposed structure shown in inset. Of note, the  $m/z$  209.1 ion labelled with an empty diamond in Supplementary Figure 4 indicates that the decarboxylation reaction also occurred during ion transfer through the interface of the mass spectrometer.

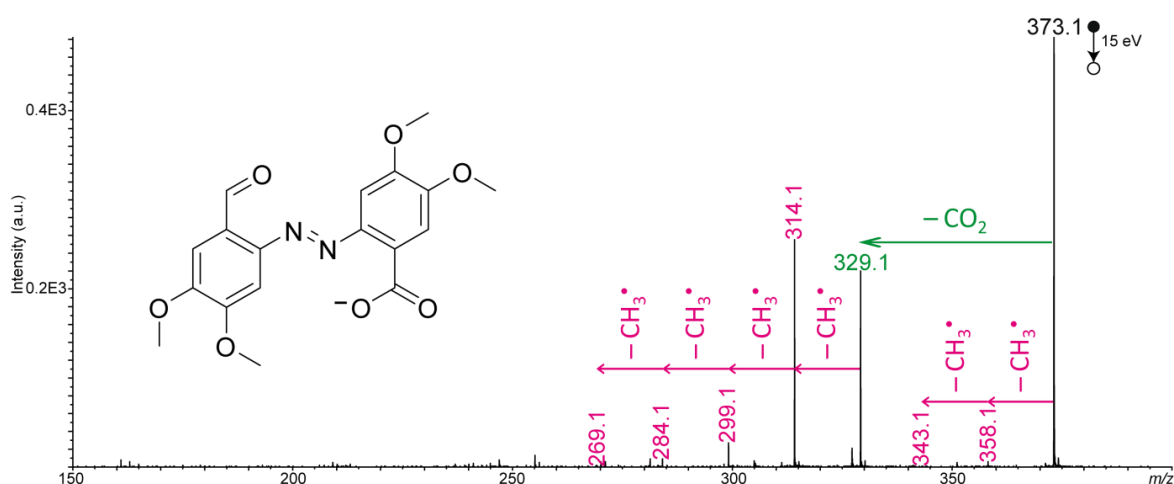

**Supplementary Figure 7.** MS/MS spectrum recorded for the photo-deprotection by-product observed at  $m/z$  373.1 ( $C_{18}H_{17}N_2O_7^-$ ,  $m/z_{th}$  373.1041,  $m/z_{exp}$  373.1022) after photo-irradiation of homopolymer **H2**, showing that the decarboxylation product ( $m/z$  329.1) successively eliminates four methyl radicals, consistent with the four methoxy groups of the precursor ion (see inset structure).

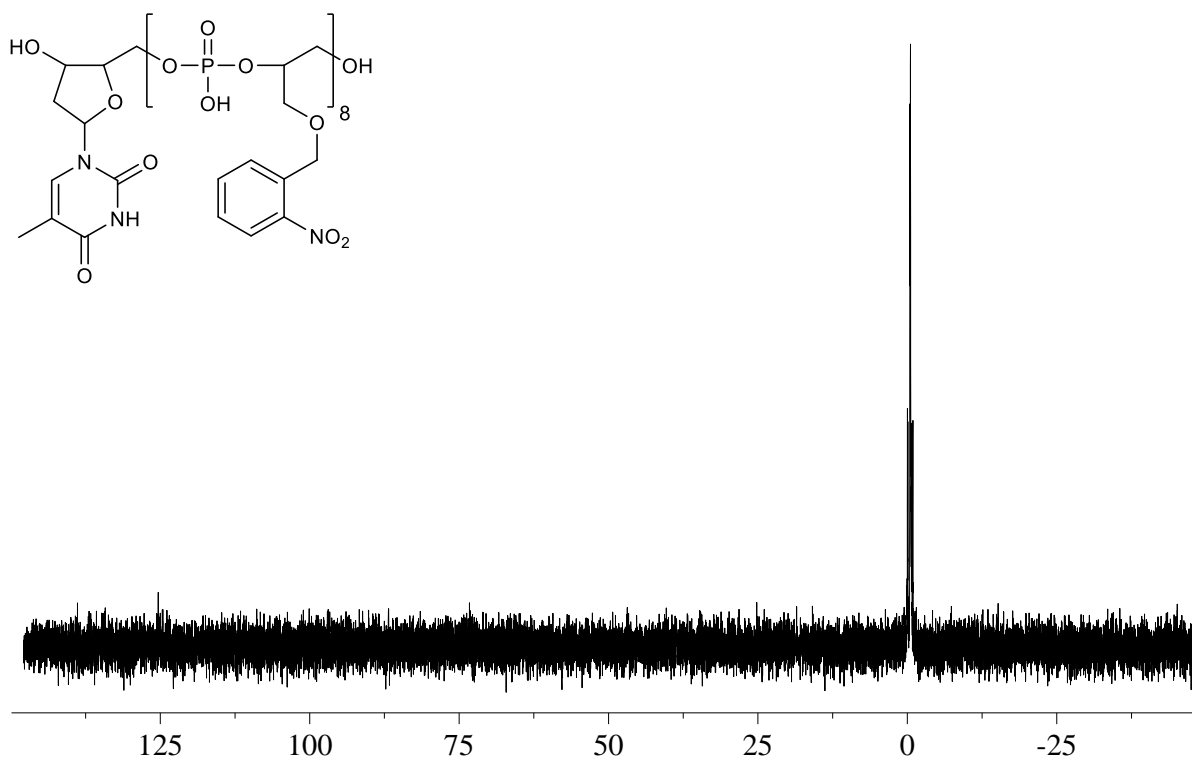

**Supplementary Figure 8.**  $^{31}\text{P}$  NMR spectrum recorded at RT in  $\text{CD}_3\text{OD}$  for homopolymer **H1**. Comparable spectra were obtained for all other homopolymers studied in this work.

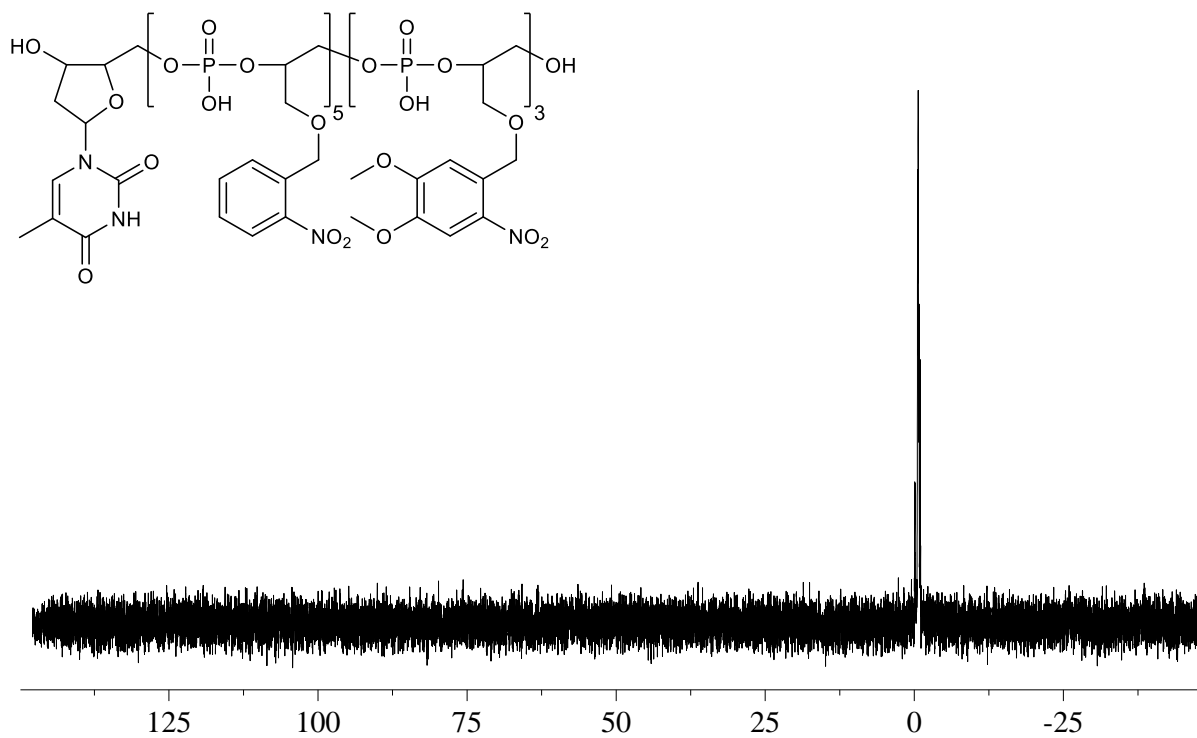

**Supplementary Figure 9.**  $^{31}\text{P}$  NMR spectrum recorded at RT in  $\text{CD}_3\text{OD}$  for copolymer **P1**. Comparable spectra were obtained for all other copolymers studied in this work.

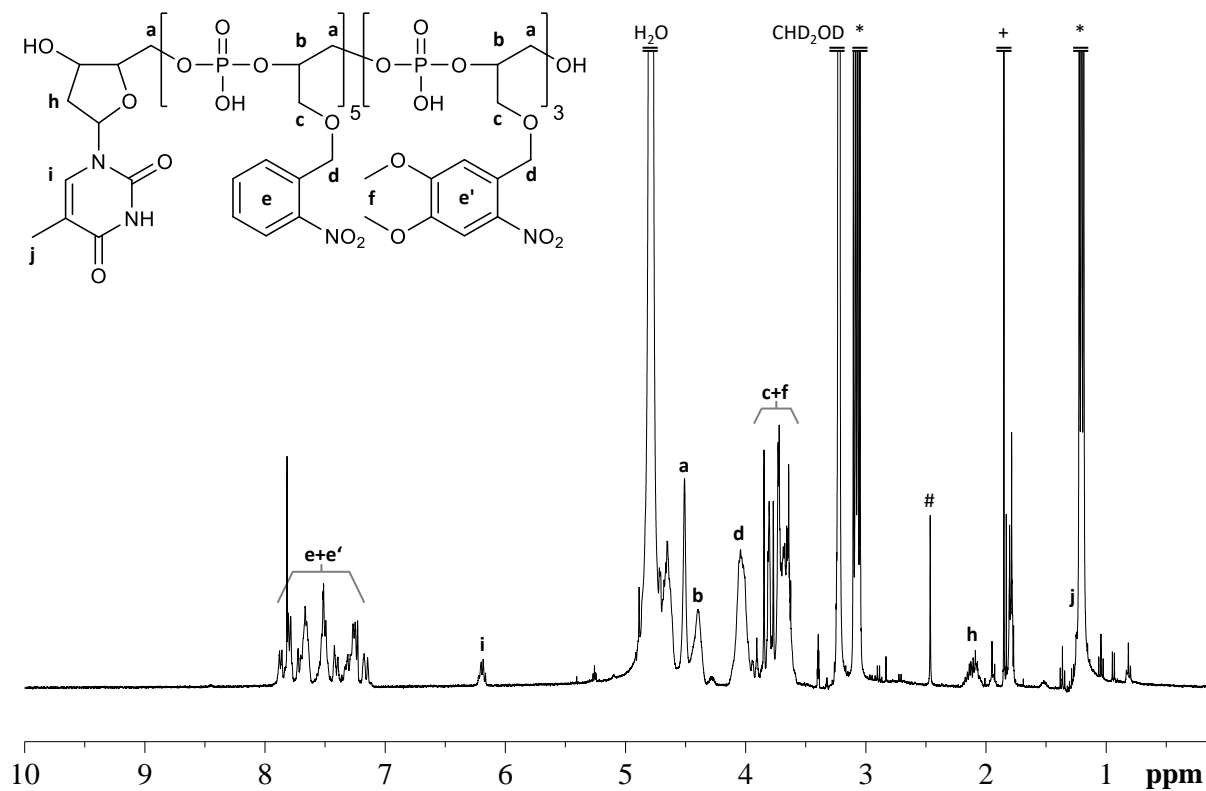

**Supplementary Figure 10.** <sup>1</sup>H NMR spectrum recorded at RT in CD<sub>3</sub>OD for copolymer P1. The star symbols indicate signals of triethylammonium counterions. (#) Methylamine, (+) acetonitrile.

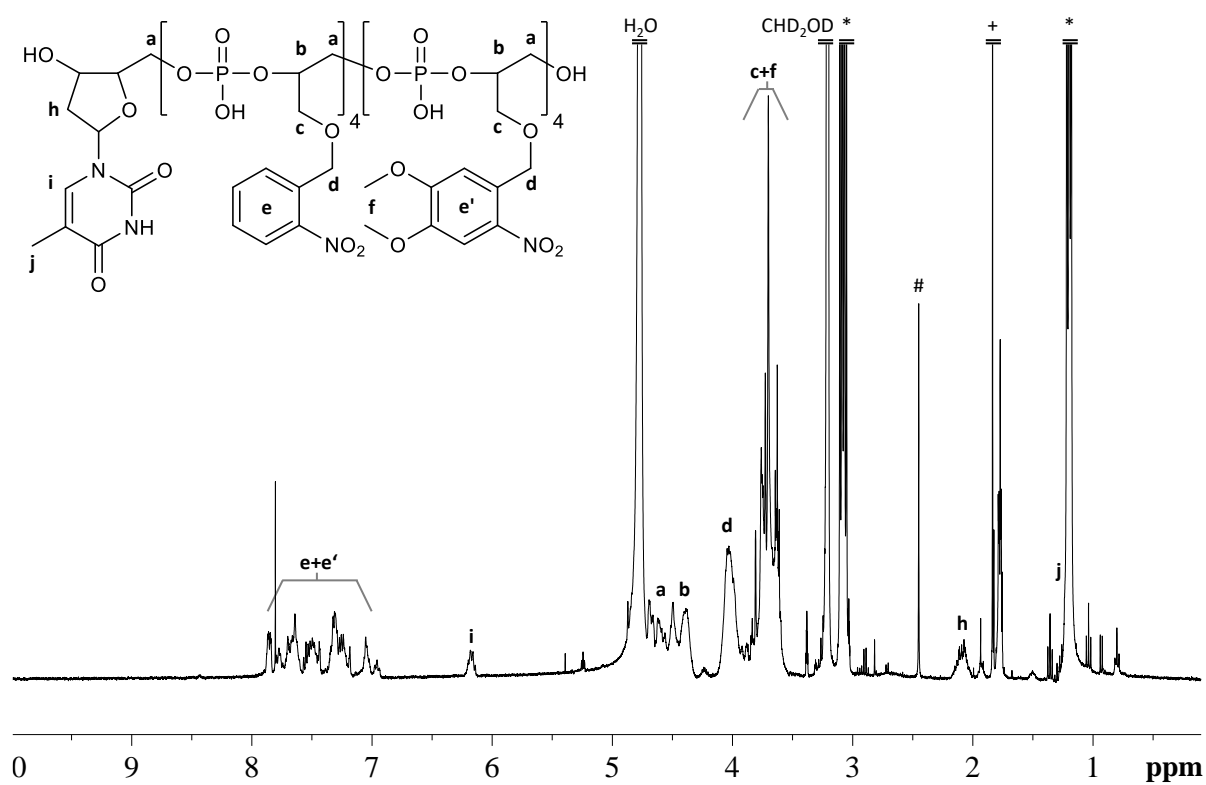

**Supplementary Figure 11.** <sup>1</sup>H NMR spectrum recorded at RT in CD<sub>3</sub>OD for copolymer P2. The star symbols indicate signals of triethylammonium counterions. (#) Methylamine, (+) acetonitrile.

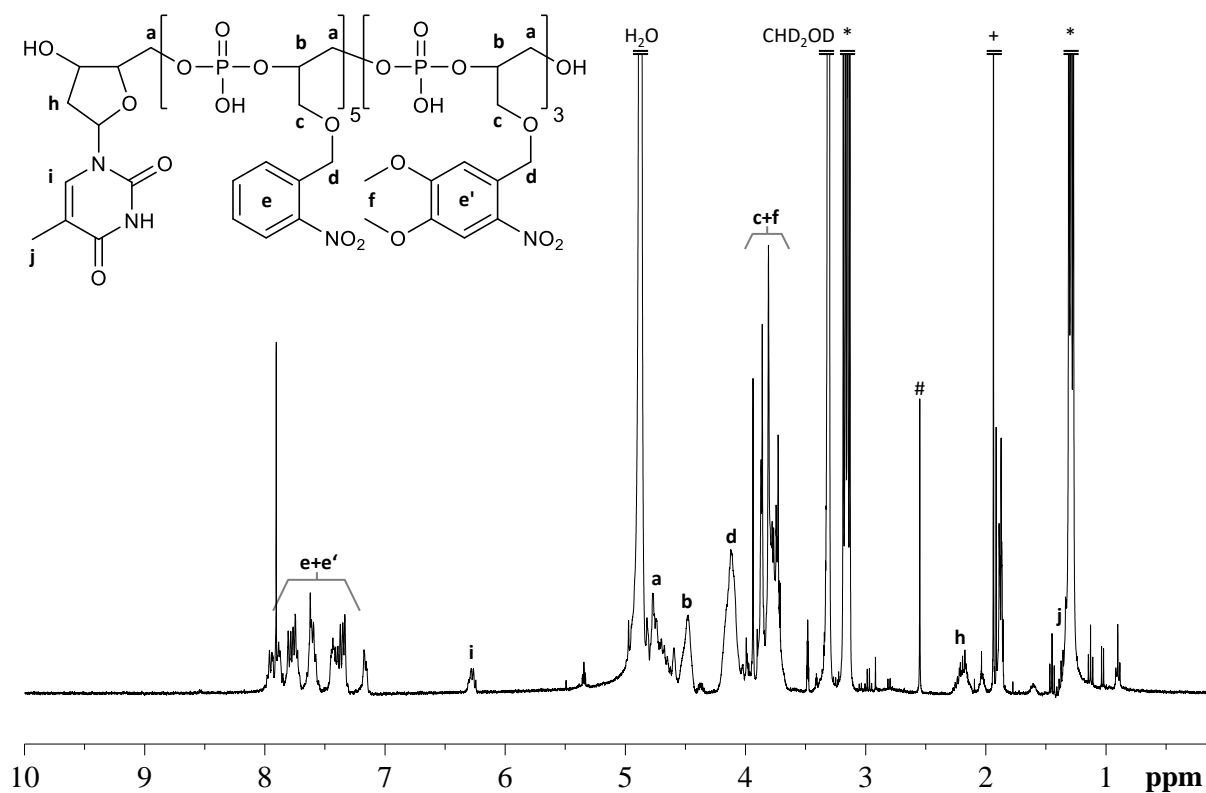

**Supplementary Figure 12.** <sup>1</sup>H NMR spectrum recorded at RT in CD<sub>3</sub>OD for copolymer P3. The star symbols indicate signals of triethylammonium counterions. (#) Methylamine, (+) acetonitrile.

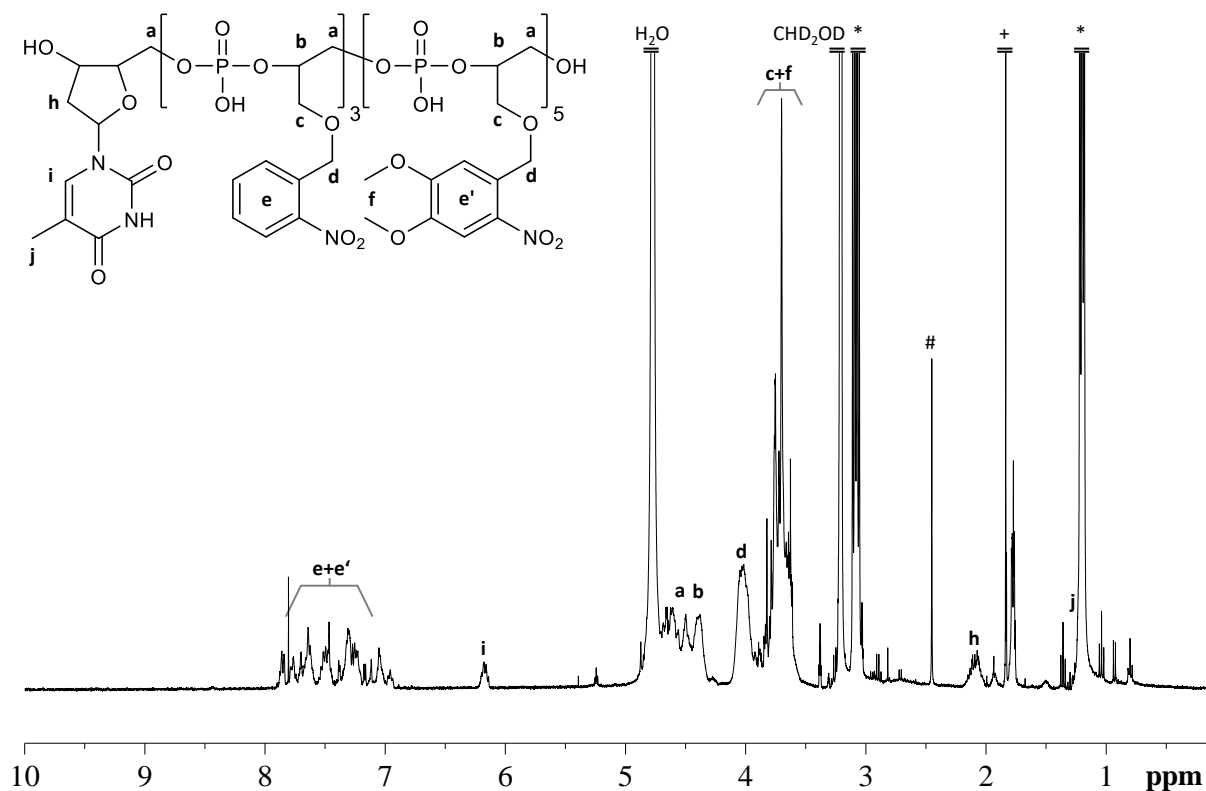

**Supplementary Figure 13.** <sup>1</sup>H NMR spectrum recorded at RT in CD<sub>3</sub>OD for copolymer P4. The star symbols indicate signals of triethylammonium counterions. (#) Methylamine, (+) acetonitrile.

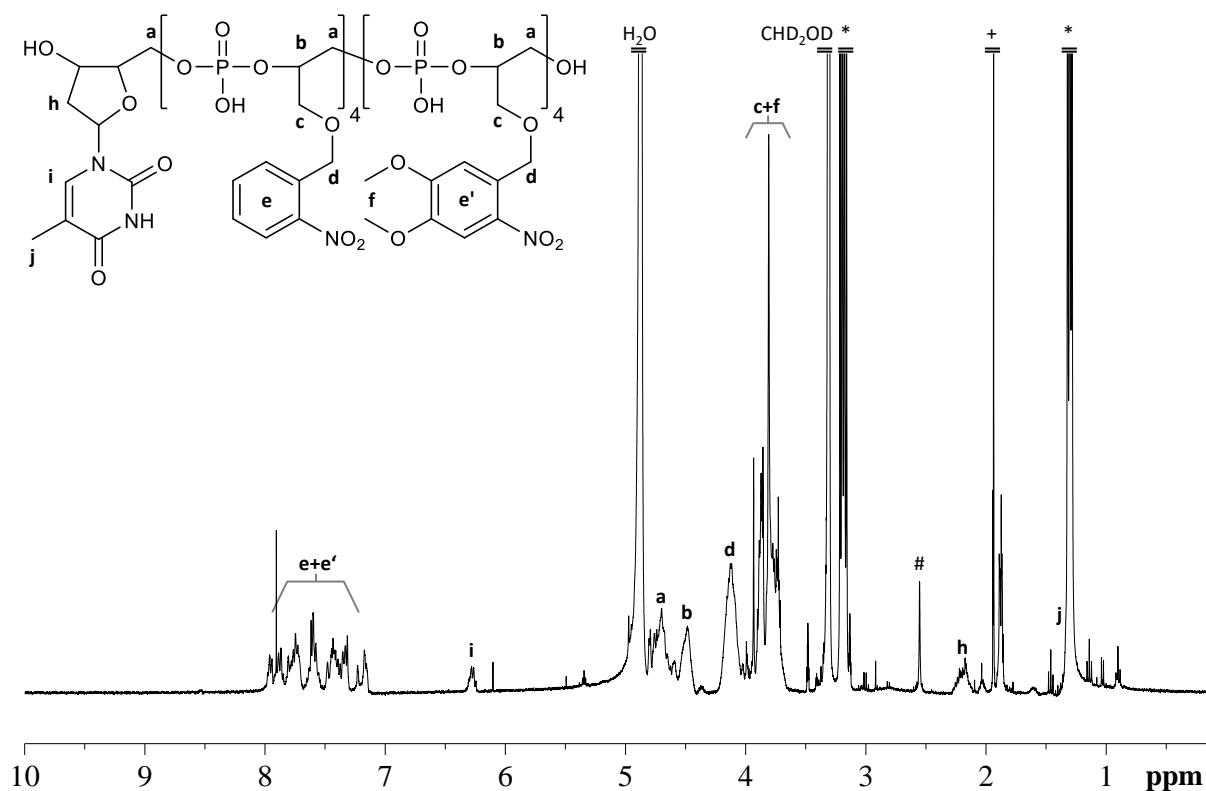

**Supplementary Figure 14.**  $^1\text{H}$  NMR spectrum recorded at RT in  $\text{CD}_3\text{OD}$  for copolymer **P5**. The star symbols indicate signals of triethylammonium counterions. (#) Methylamine, (+) acetonitrile.

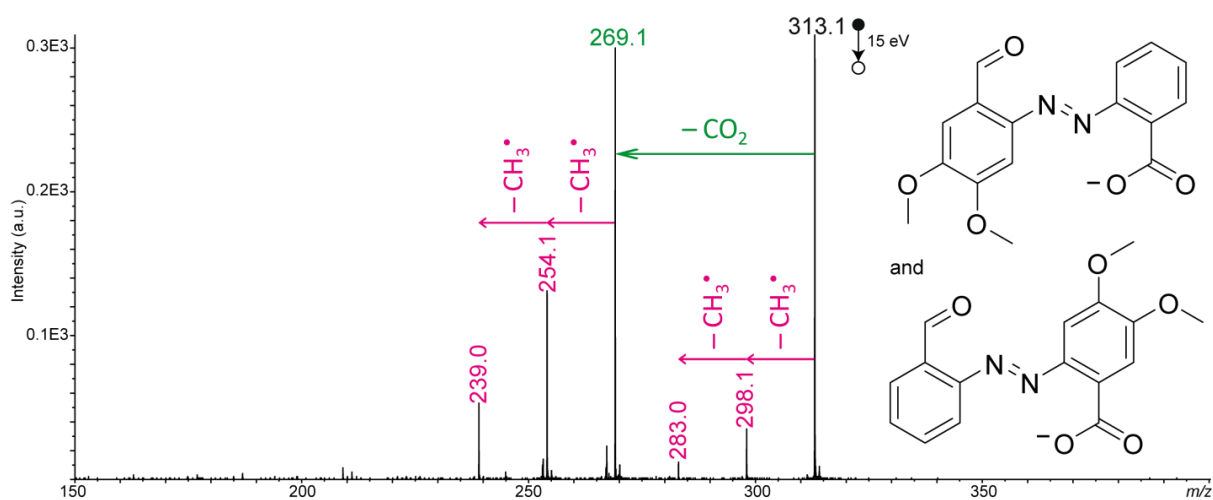

**Supplementary Figure 15.** MS/MS spectrum recorded for the photo-deprotection by-product observed at  $m/z$  313.1 ( $\text{C}_{16}\text{H}_{13}\text{N}_2\text{O}_5^-$ ,  $m/z_{\text{th}}$  313.0830,  $m/z_{\text{exp}}$  313.0835) after photo-irradiation of copolymer **P1**, showing that the decarboxylation product ( $m/z$  269.1) successively eliminates two methyl radicals, consistent with the two methoxy groups in the isomeric precursors (see inset structure).



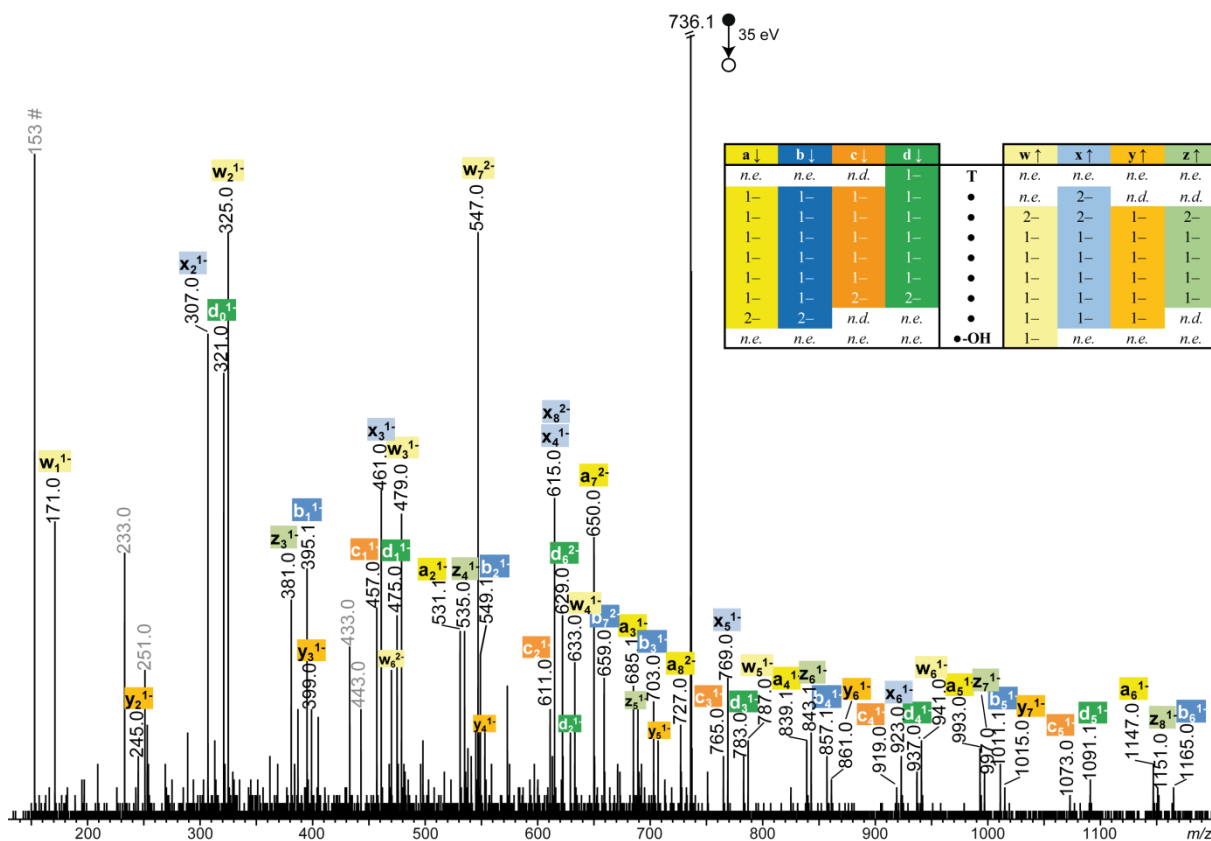

**Supplementary Figure 16.** MS/MS spectrum recorded for copolymer **P1'** after photo-exposure, using a 35 eV collision energy (laboratory frame) to activate the doubly deprotonated precursor at  $m/z$  736.1. Peaks annotated in grey correspond to secondary fragments, including the deprotonated unit ( $m/z$  153.0) designated by #. The inset table shows that most expected members of the eight fragment series are detected and evidence the monotonic sequence of **P1'**. *n.d.*: not detected. *n.e.*: not expected.

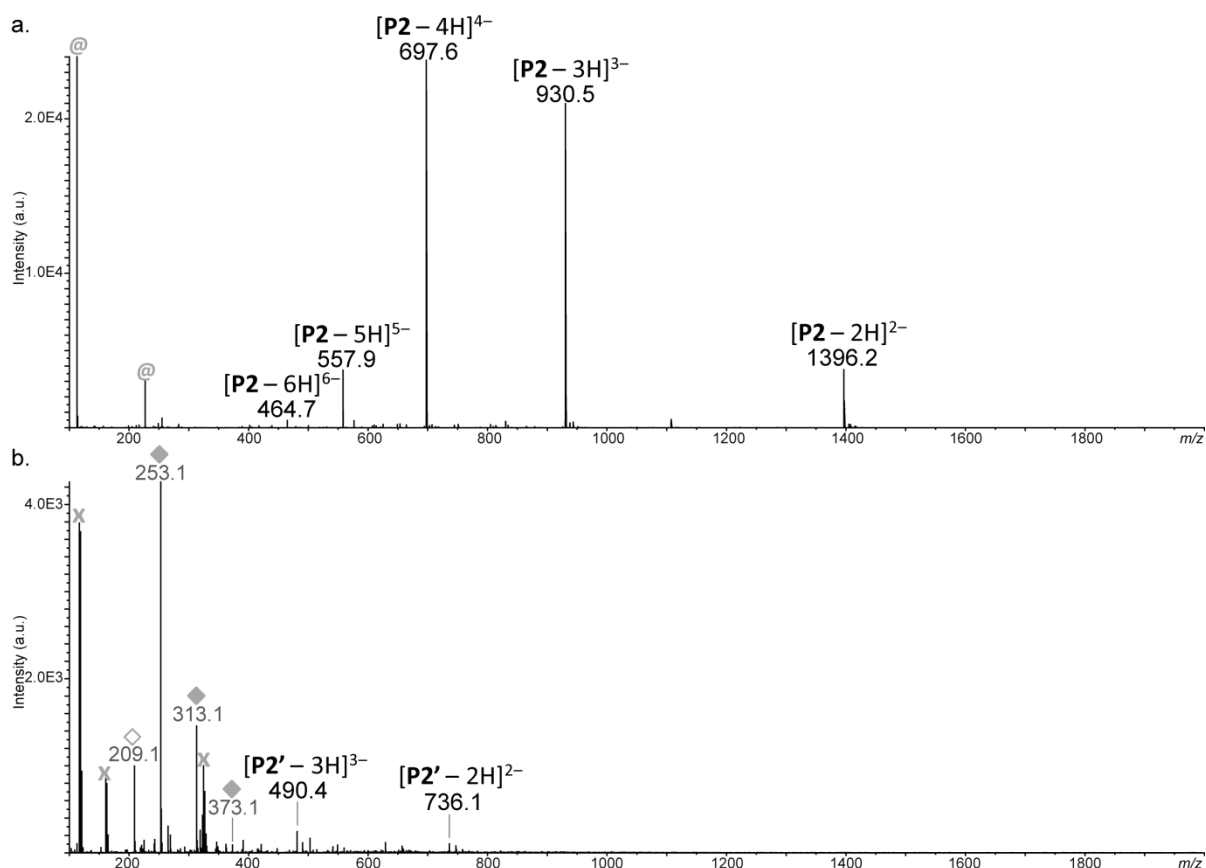

**Supplementary Figure 17.** ESI HRMS spectra recorded for (a) copolymer **P2** before irradiation and (b) the resulting polymer **P2'** after photo-exposure. Grey symbols designate clusters of trifluoroacetic acid (@), clusters of trichloroacetic acid (x) or photo-deprotection by-products (diamond).

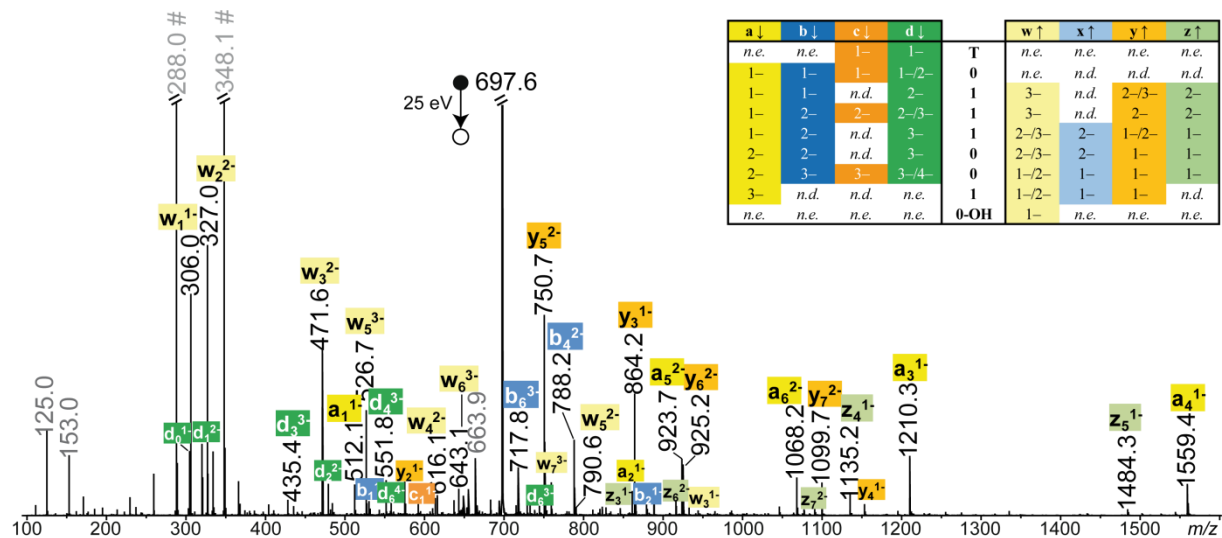

**Supplementary Figure 18.** MS/MS spectrum recorded for copolymer **P2** before irradiation, using a 25 eV collision energy (laboratory frame) to activate the quadruply deprotonated precursor at  $m/z$  697.6. Peaks annotated in grey correspond to secondary fragments, including the deprotonated units,  $[0 - H]^-$  at  $m/z$  288.0 and  $[1 - H]^-$  at  $m/z$  348.1, both designated by #. Inset Table: Sequence coverage of **P2** (n.d.: not detected; n.e.: not expected). After photo-exposure, the resulting polymer **P2'** exhibits the same MS/MS spectrum as **P1'** in Supplementary Figure 16.

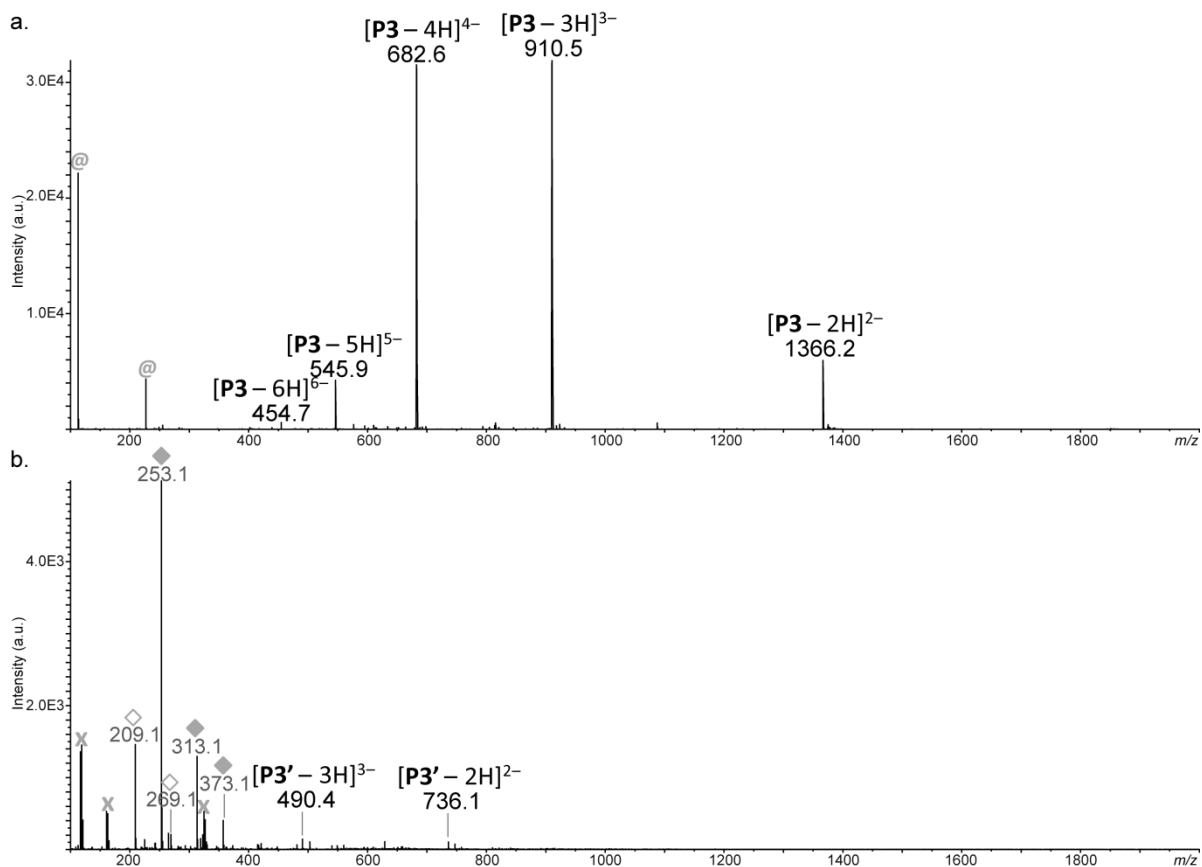

**Supplementary Figure 19.** ESI HRMS spectra recorded for (a) copolymer **P3** before irradiation and (b) the resulting polymer **P3'** after photo-exposure. Grey symbols designate clusters of trifluoroacetic acid (@), clusters of trichloroacetic acid (x) or photo-deprotection by-products (diamond).

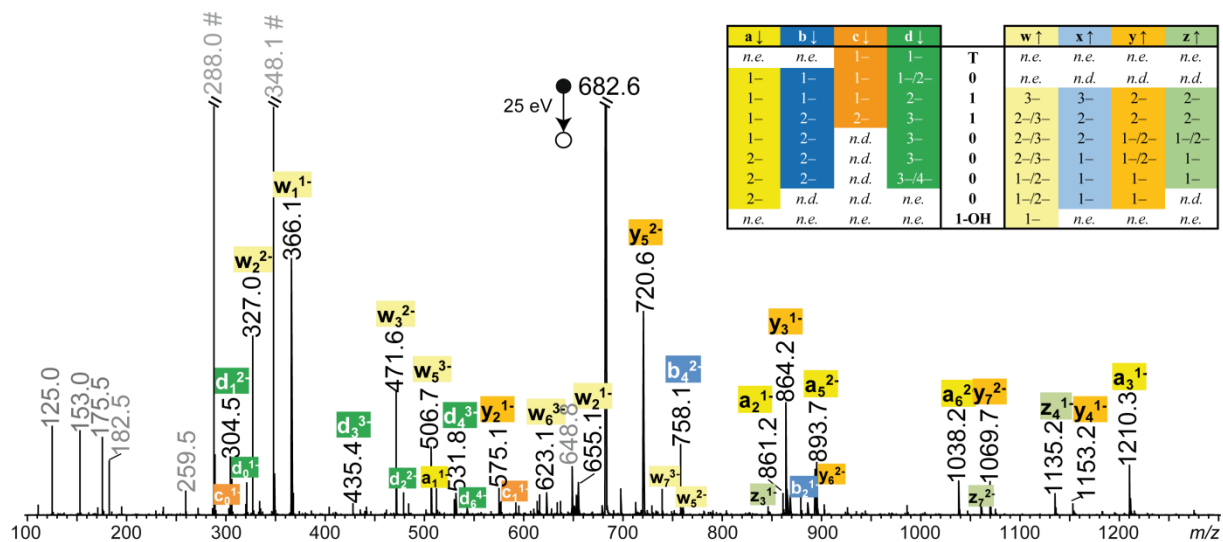

**Supplementary Figure 20.** MS/MS spectrum recorded for copolymer **P3** before irradiation, using a 25 eV collision energy (laboratory frame) to activate the quadruply deprotonated precursor at  $m/z$  682.6. Peaks annotated in grey correspond to secondary fragments, including the deprotonated units,  $[0-H]^-$  at  $m/z$  288.0 and  $[1-H]^-$  at  $m/z$  348.1, both designated by #. Inset Table: Sequence coverage of **P3** (n.d.: not detected; n.e.: not expected). After photo-exposure, the resulting polymer **P3'** exhibits the same MS/MS spectrum as **P1'** in Supplementary Figure 16.

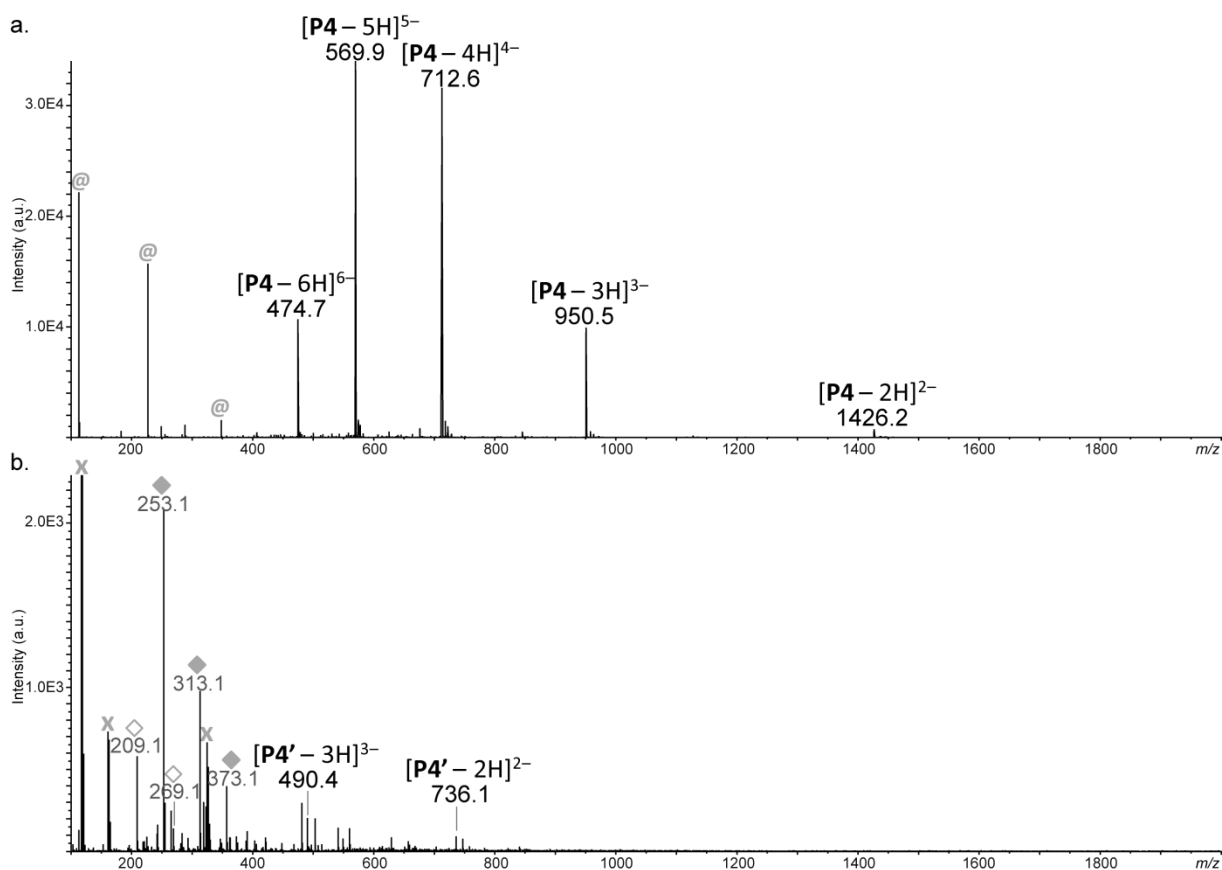

**Supplementary Figure 21.** ESI HRMS spectra recorded for (a) copolymer **P4** before irradiation and (b) the resulting polymer **P4'** after photo-exposure. Grey symbols designate clusters of trifluoroacetic acid (@), clusters of trichloroacetic acid (x) or photo-deprotection by-products (diamond).

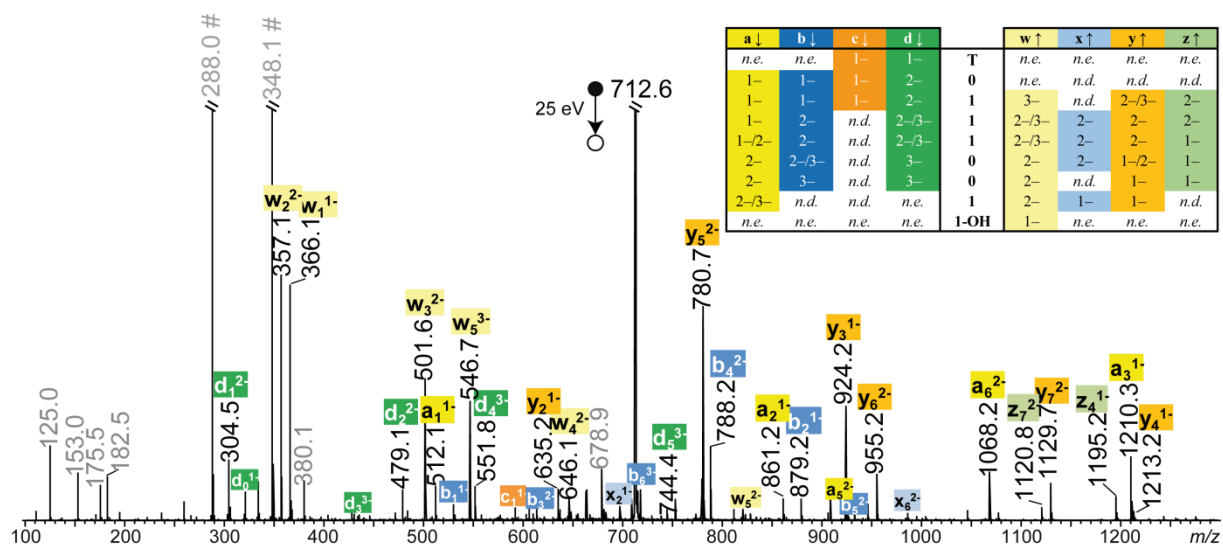

**Supplementary Figure 22.** MS/MS spectrum recorded for copolymer **P4** before irradiation, using a 25 eV collision energy (laboratory frame) to activate the quadruply deprotonated precursor at  $m/z$  712.6. Peaks annotated in grey correspond to secondary fragments, including the deprotonated units,  $[0 - H]^-$  at  $m/z$  288.0 and  $[1 - H]^-$  at  $m/z$  348.1, both designated by #. Inset Table: Sequence coverage of **P4** (n.d.: not detected; n.e.: not expected). After photo-exposure, the resulting polymer **P4'** exhibits the same MS/MS spectrum as **P1'** in Supplementary Figure 16.

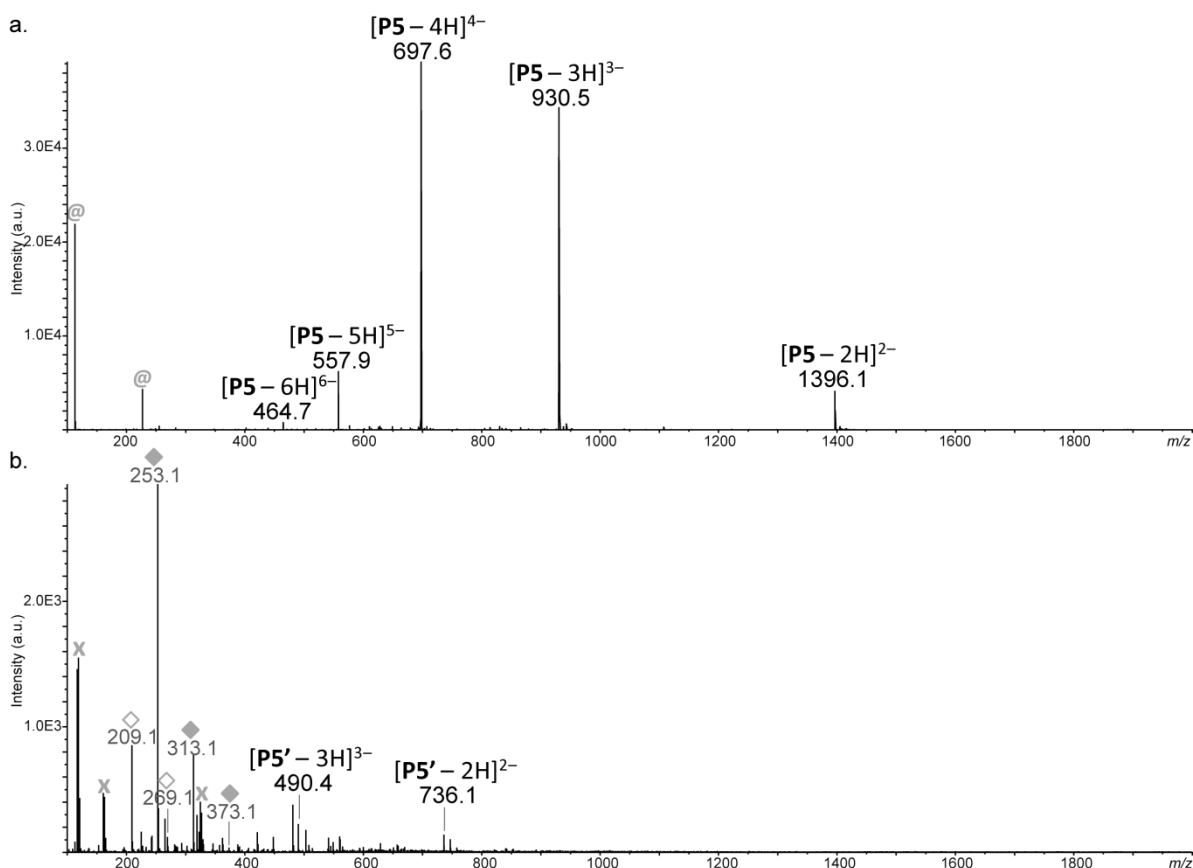

**Supplementary Figure 23.** ESI HRMS spectra recorded for (a) copolymer **P5** before irradiation and (b) the resulting polymer **P5'** after photo-exposure. Grey symbols designate clusters of trifluoroacetic acid (@), clusters of trichloroacetic acid (x) or photo-deprotection by-products (diamond).

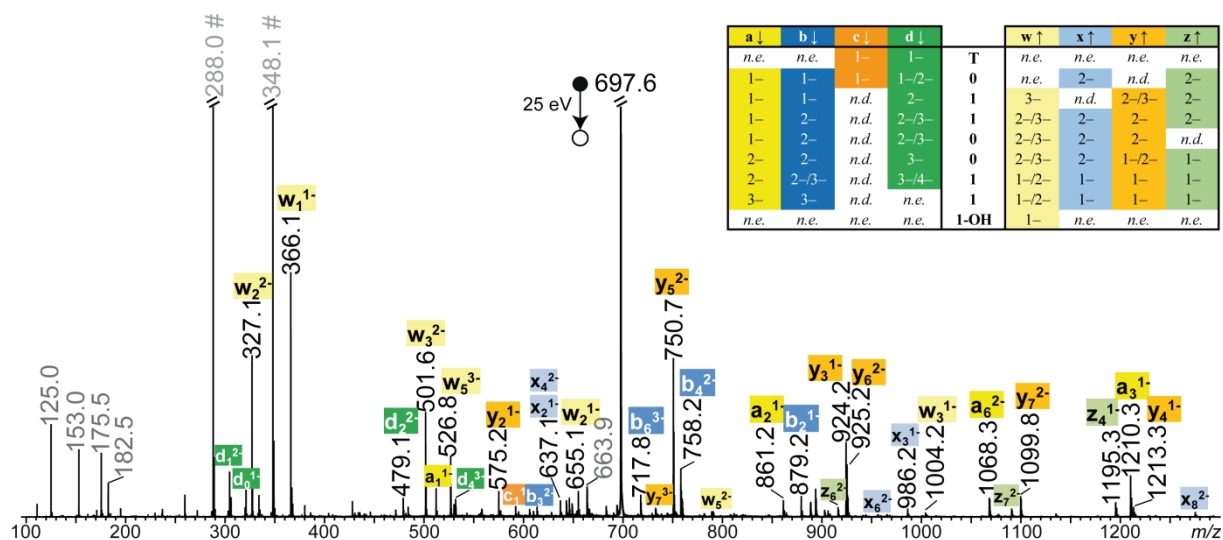

**Supplementary Figure 24.** MS/MS spectrum recorded for copolymer **P5** before irradiation, using a 25 eV collision energy (laboratory frame) to activate the quadruply deprotonated precursor at  $m/z$  697.6. Peaks annotated in grey correspond to secondary fragments, including the deprotonated units, [0-H]<sup>-</sup> at  $m/z$  288.0 and [1-H]<sup>-</sup> at  $m/z$  348.1, both designated by #. Inset Table: Sequence coverage of **P5** (n.d.: not detected; n.e.: not expected). After photo-exposure, the resulting polymer **P5'** exhibits the same MS/MS spectrum as **P1'** in Supplementary Figure 16.

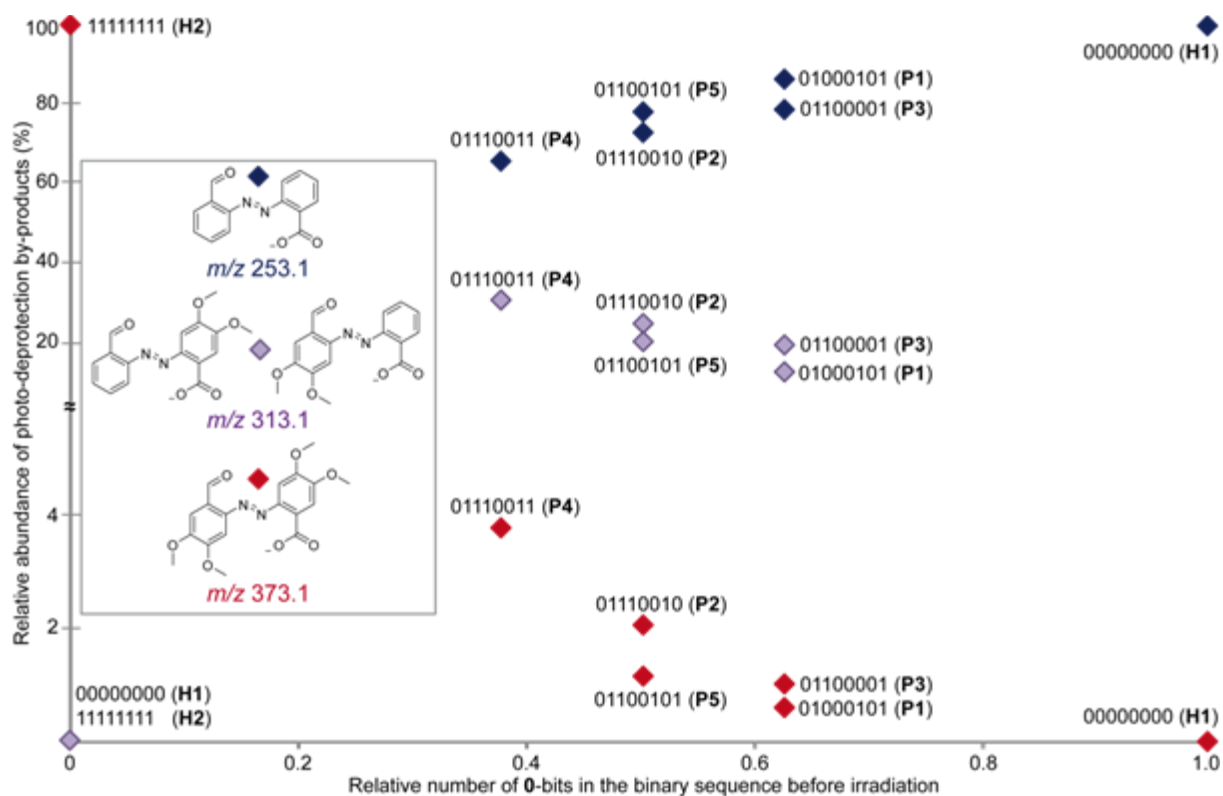

**Supplementary Figure 25.** Relative abundance of photolysis by-products (structure shown in inset) as a function of 0/1 comonomer composition of the polymer before photo-irradiation. Each data point is annotated by the sequence of the corresponding polymer before irradiation. The relative amount of the homodimer detected at  $m/z$  253.1 increases with the fraction of 0-bits in the original sequence. Similarly, the relative abundance of the homodimer detected at  $m/z$  373.1 increase with the fraction of 1-bits (i.e., decreasing fraction of 0-bits) in the original sequence. Consistent with the decreasing amount of photocleaved veratryl units in the irradiated solution, the relative intensity of the  $m/z$  313.1 signal, assigned to a heterodimer, decreased as the fraction of 0-bits increased in the original sequence.

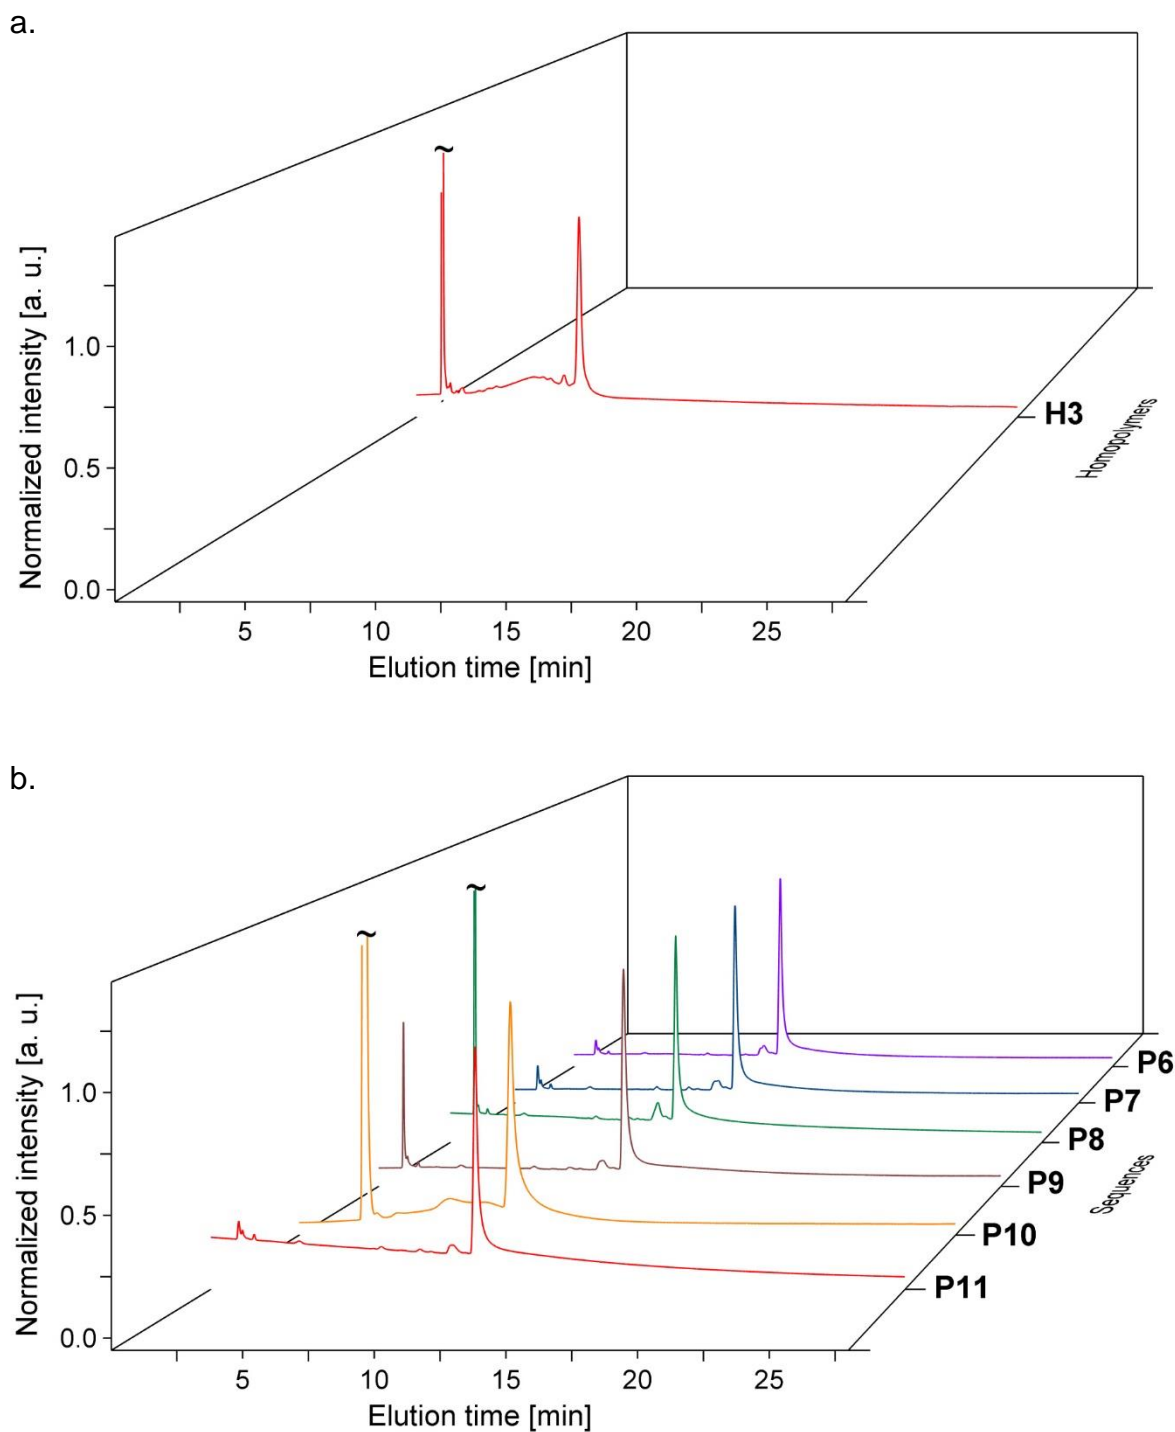

**Supplementary Figure 26.** HPLC traces measured for (a) homopolymers **H3** and (b) copolymers **P6-P11**. The chromatograms are recorded at  $\lambda = 260$  nm. Experimental conditions: phase A: 10 % MeCN 20 % 2M  $\text{NH}_3$  in water, phase B: 2.5 M NaCl in water; gradient: 0-3 min 5 % B, 3-23 min 5 % B-30 % B, 23-28 min 30 % B, 28-35 min 30%  $\rightarrow$  5 % B; flow rate: 1 mL $\cdot$ min $^{-1}$ .

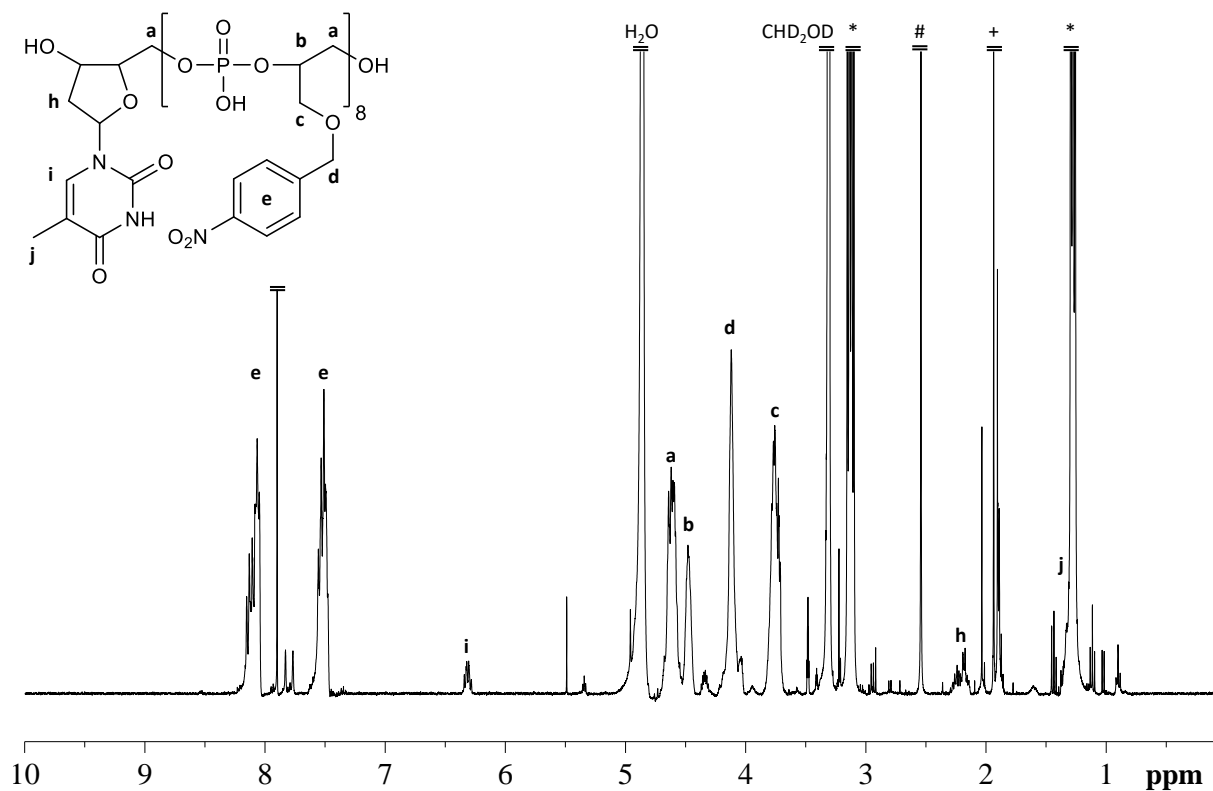

**Supplementary Figure 27.** <sup>1</sup>H NMR spectrum recorded at RT in CD<sub>3</sub>OD for homopolymer **H3**. The star symbols indicate signals of triethylammonium counterions. (#) Methylamine, (+) acetonitrile.



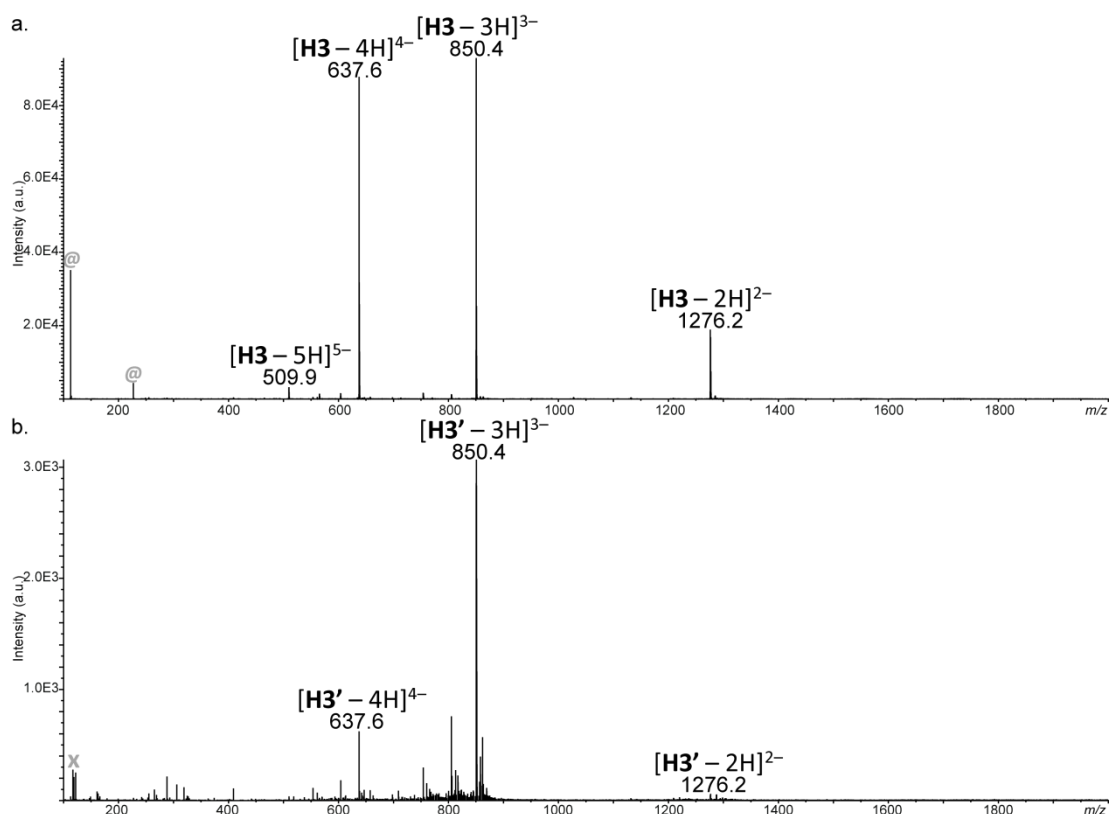

**Supplementary Figure 28.** ESI HRMS spectra recorded for (a) homopolymer **H3** before irradiation and (b) the resulting polymer **H3'** after photo-exposure. Grey symbols designate clusters of trifluoroacetic acid (@) and clusters of trichloroacetic acid (x).

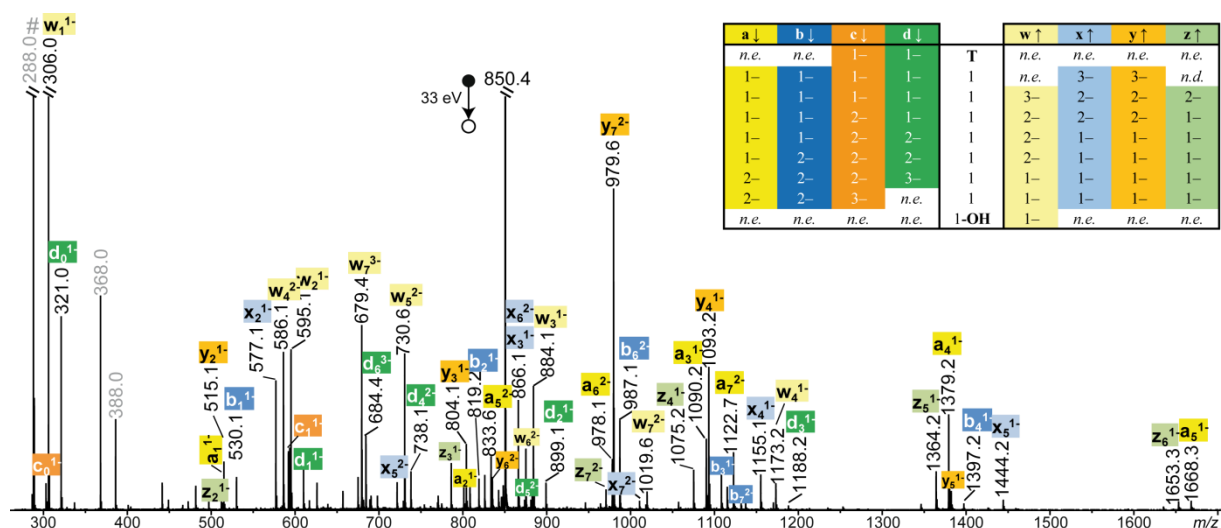

**Supplementary Figure 29.** MS/MS spectrum recorded for homopolymer **H3** before photo-exposure, using a 33 eV collision energy (laboratory frame) to activate the triply deprotonated precursor at  $m/z$  850.4. Peaks annotated in grey correspond to secondary fragments, including the deprotonated unit ( $m/z$  288.0) designated by #. The inset table shows that most expected members of the eight fragment series are detected and evidence the monotonic sequence of **H3**. *n.d.*: not detected. *n.e.*: not expected.

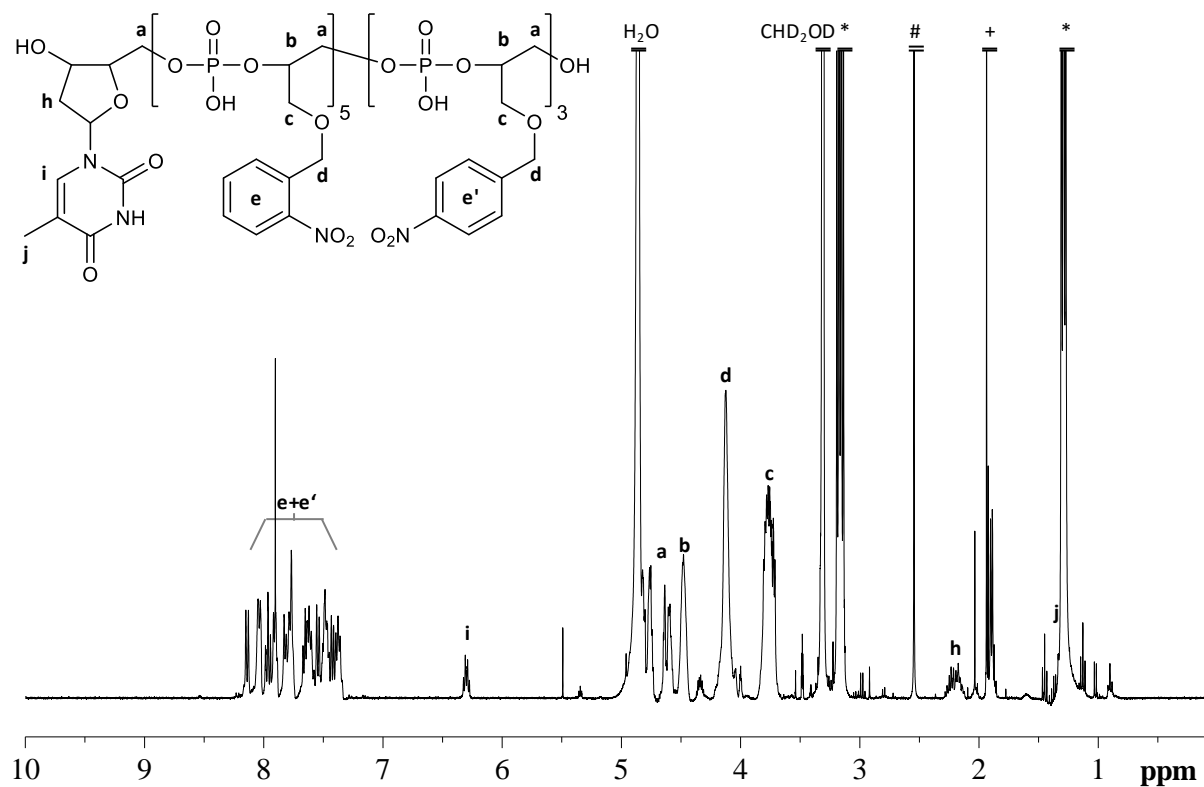

**Supplementary Figure 30.** <sup>1</sup>H NMR spectrum recorded at RT in CD<sub>3</sub>OD for copolymer **P6**. The star symbols indicate signals of triethylammonium counterions. (#) Methylamine, (+) acetonitrile.

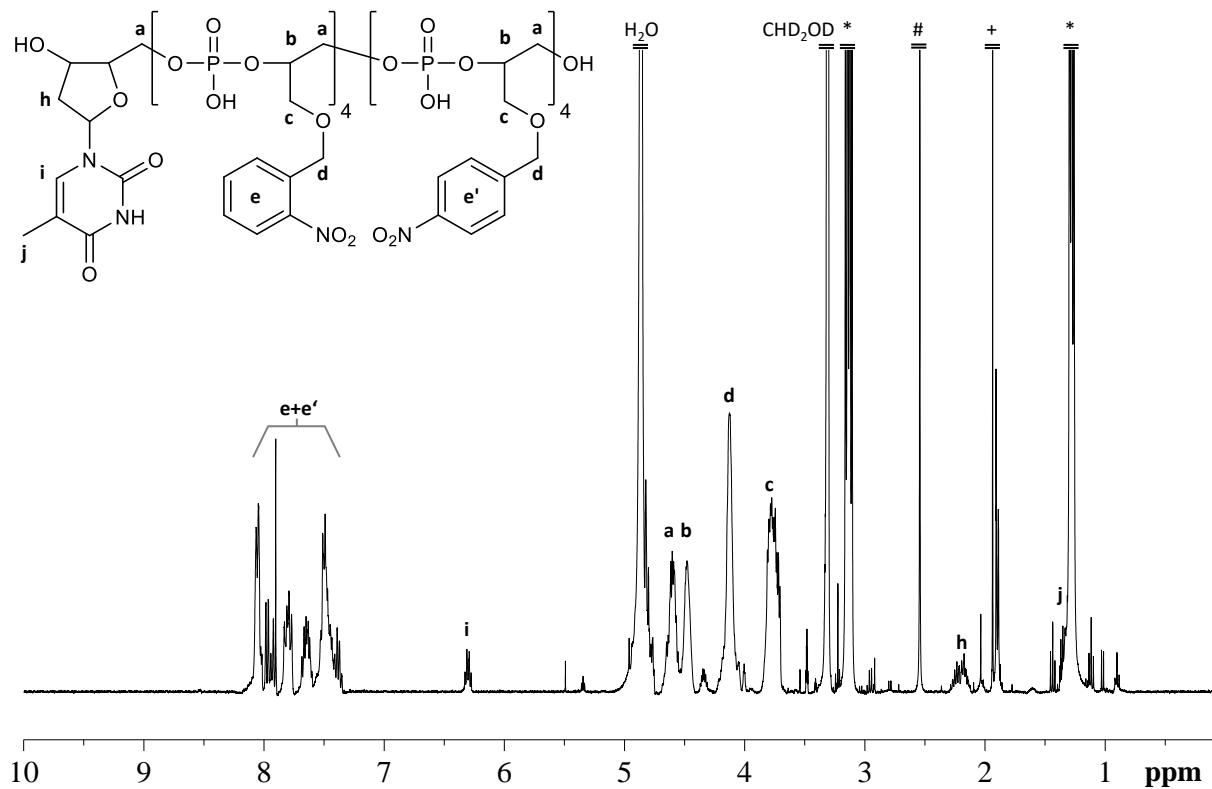

**Supplementary Figure 31.** <sup>1</sup>H NMR spectrum recorded at RT in CD<sub>3</sub>OD for copolymer **P7**. The star symbols indicate signals of triethylammonium counterions. (#) Methylamine, (+) acetonitrile.

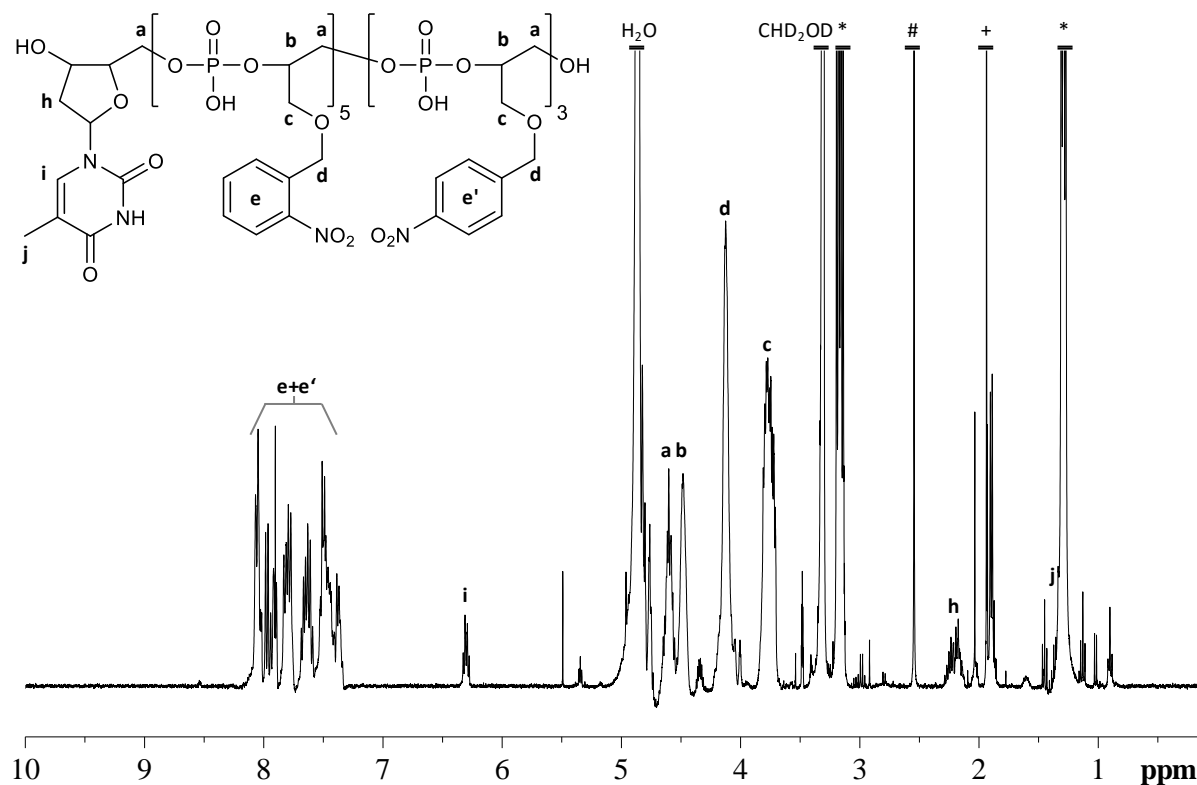

**Supplementary Figure 32.**  $^1\text{H}$  NMR spectrum recorded at RT in  $\text{CD}_3\text{OD}$  for copolymer **P8**. The star symbols indicate signals of triethylammonium counterions. (#) Methylamine, (+) acetonitrile.

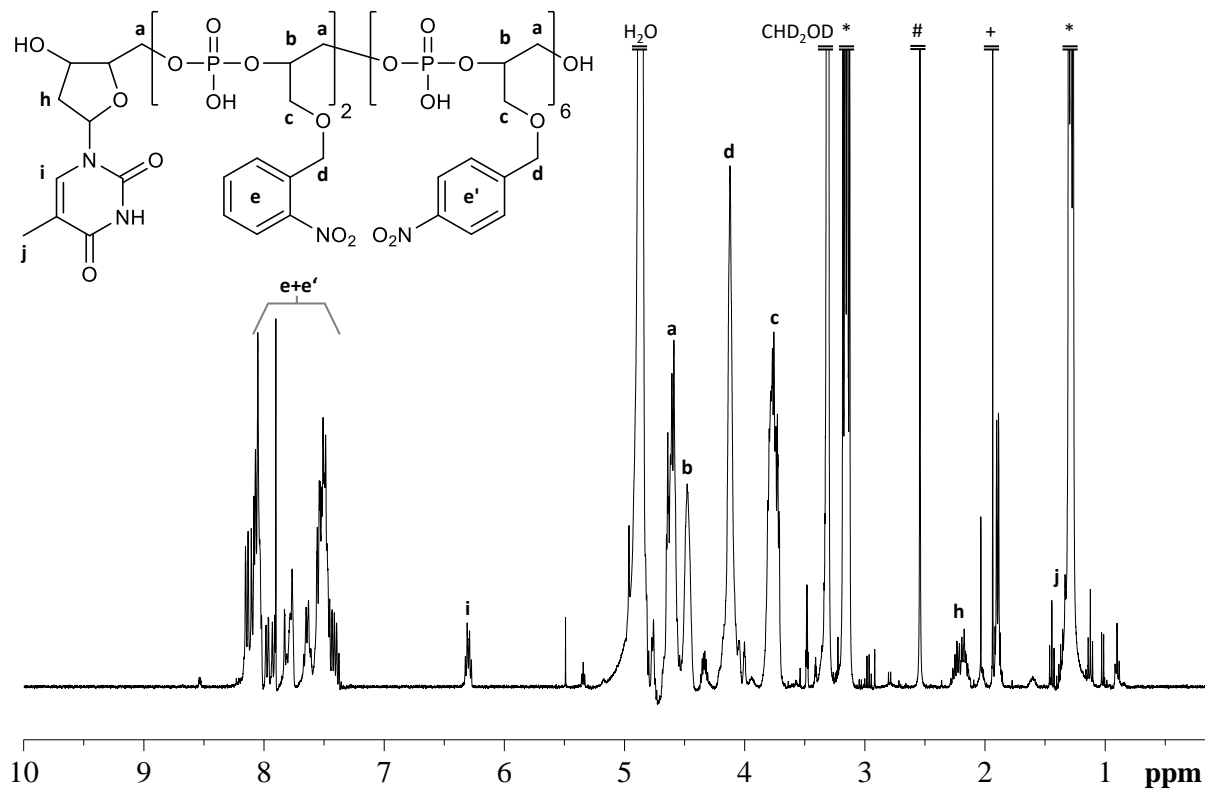

**Supplementary Figure 33.**  $^1\text{H}$  NMR spectrum recorded at RT in  $\text{CD}_3\text{OD}$  for copolymer **P9**. The star symbols indicate signals of triethylammonium counterions. (#) Methylamine, (+) acetonitrile.

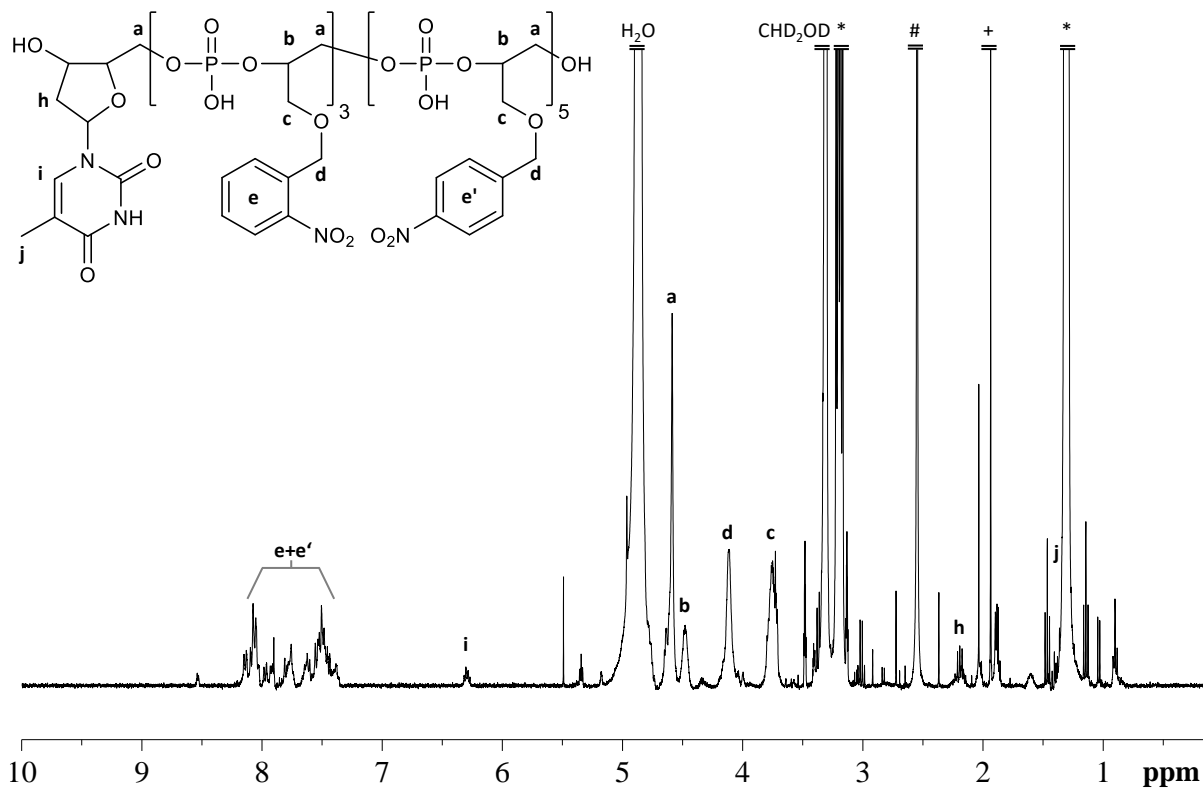

**Supplementary Figure 34.** <sup>1</sup>H NMR spectrum recorded at RT CD<sub>3</sub>OD for copolymer **P10**. The star symbols indicate signals of triethylammonium counterions. (#) Methylamine, (+) acetonitrile.

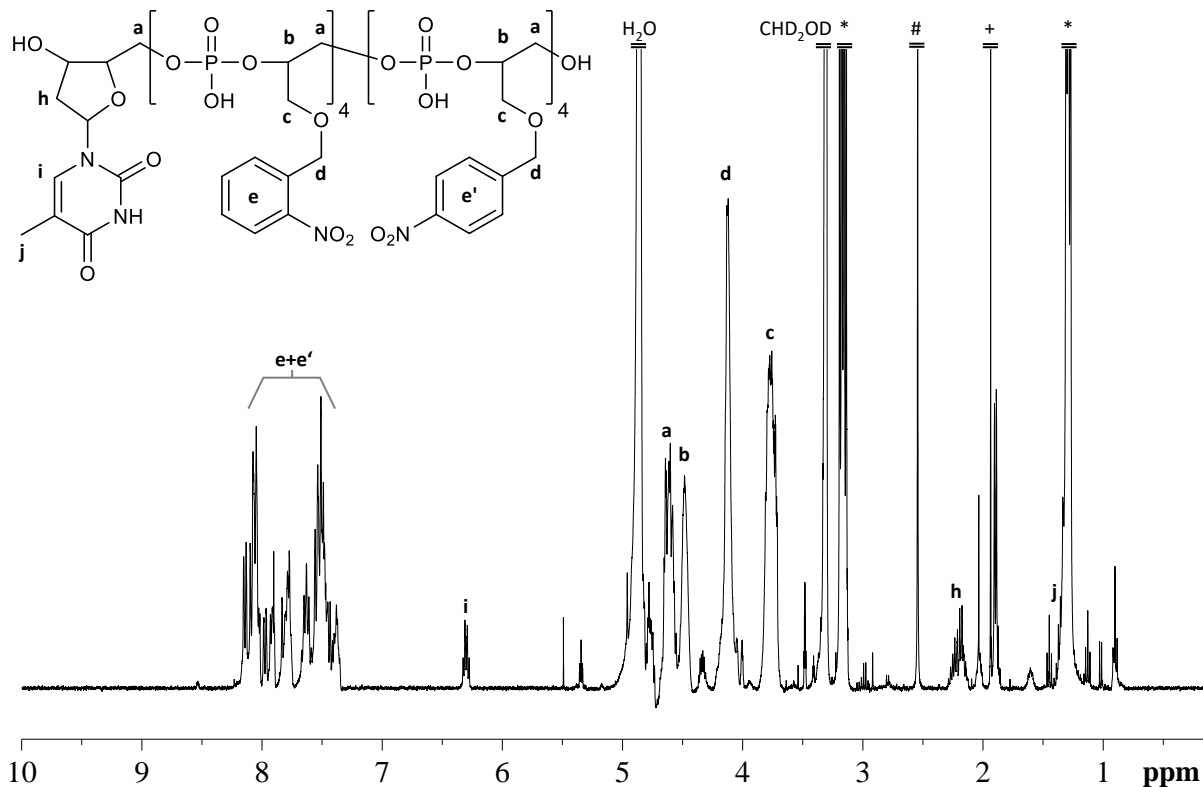

**Supplementary Figure 35.** <sup>1</sup>H NMR spectrum recorded at RT CD<sub>3</sub>OD for copolymer **P11**. The star symbols indicate signals of triethylammonium counterions. (#) Methylamine, (+) acetonitrile.

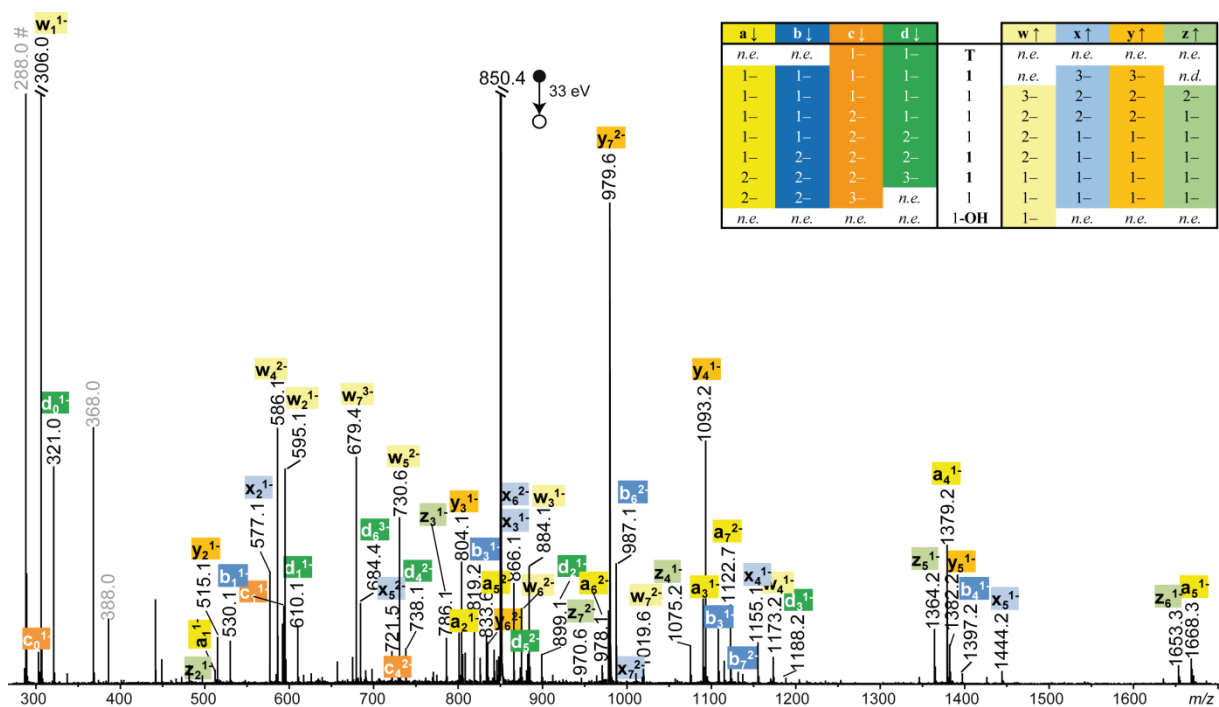

**Supplementary Figure 36.** MS/MS spectrum recorded for copolymer **P10** before irradiation, using a 33 eV collision energy (laboratory frame) to activate the triply deprotonated precursor at  $m/z$  850.4. Peaks annotated in grey correspond to secondary fragments, including deprotonated units (both at  $m/z$  288.0) designated by #. The inset table shows that all (but one) expected members of the eight fragment series are detected and evidence the monotonic sequence of **P10** (*n.d.*: not detected; *n.e.*: not expected).

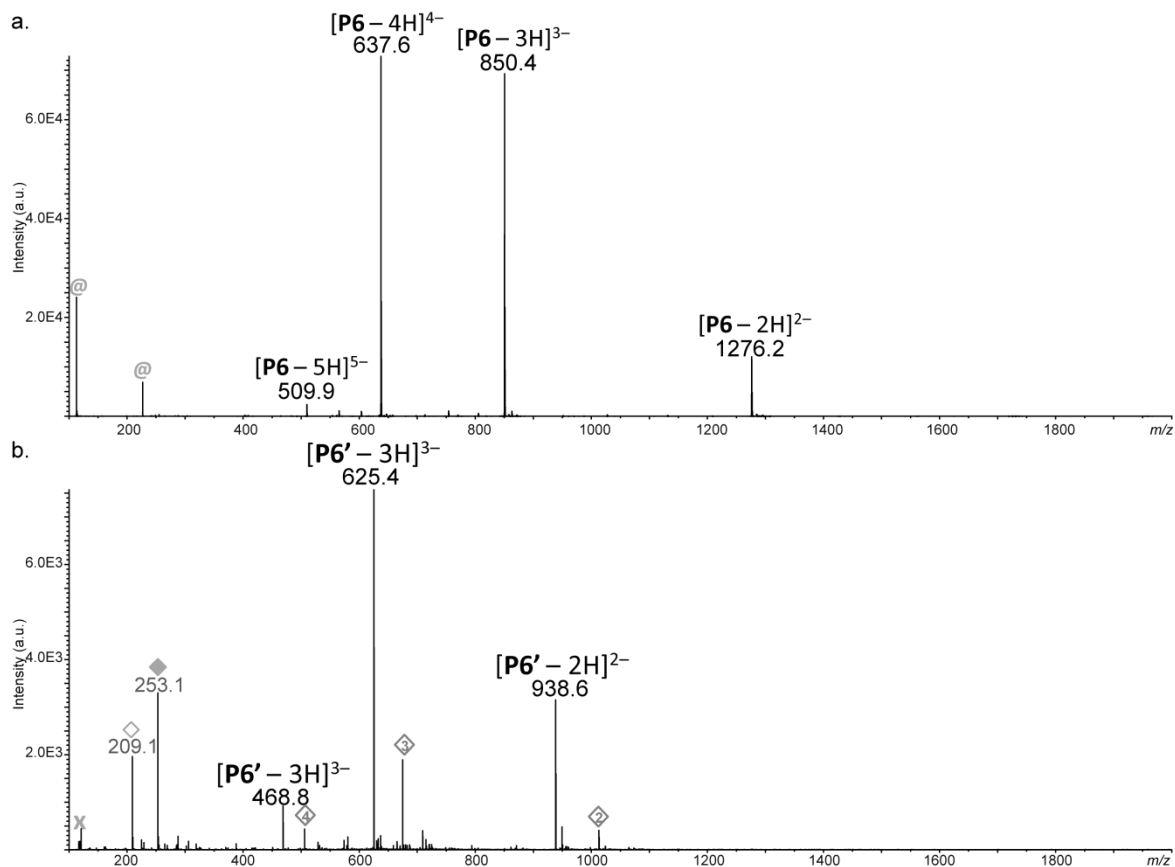

**Supplementary Figure 37.** ESI HRMS spectra recorded for (a) copolymer **P6** before irradiation and (b) the resulting polymer **P6'** after photo-exposure. Grey symbols designate clusters of trifluoroacetic acid (@), clusters of trichloroacetic acid (x) or photo-deprotection by-products (diamonds).

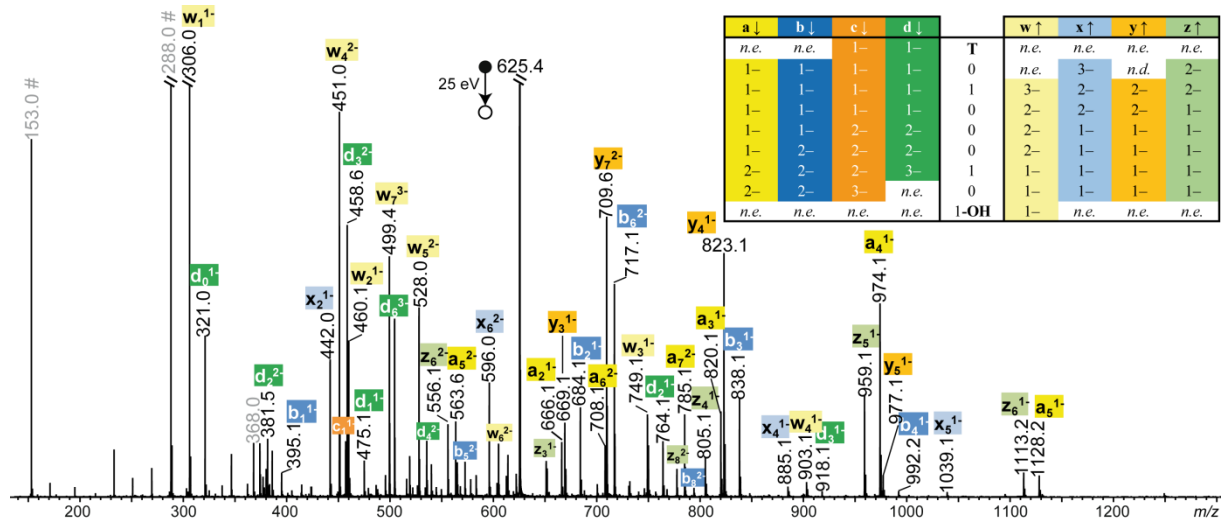

**Supplementary Figure 38.** MS/MS spectrum recorded for copolymer **P6'** obtained after irradiation of **P6**, using a 25 eV collision energy (laboratory frame) to activate the triply deprotonated precursor at  $m/z$  625.4. Peaks annotated in grey correspond to secondary fragments, including the deprotonated units,  $[0-H]^-$  at  $m/z$  153.0 and  $[1-H]^-$  at  $m/z$  288.0, both designated by #. Inset Table: Sequence coverage of **P6'** (n.d.: not detected; n.e.: not expected). Before photo-exposure, copolymer **P6** exhibits the same MS/MS spectrum as **P10** in Supplementary Figure 35.

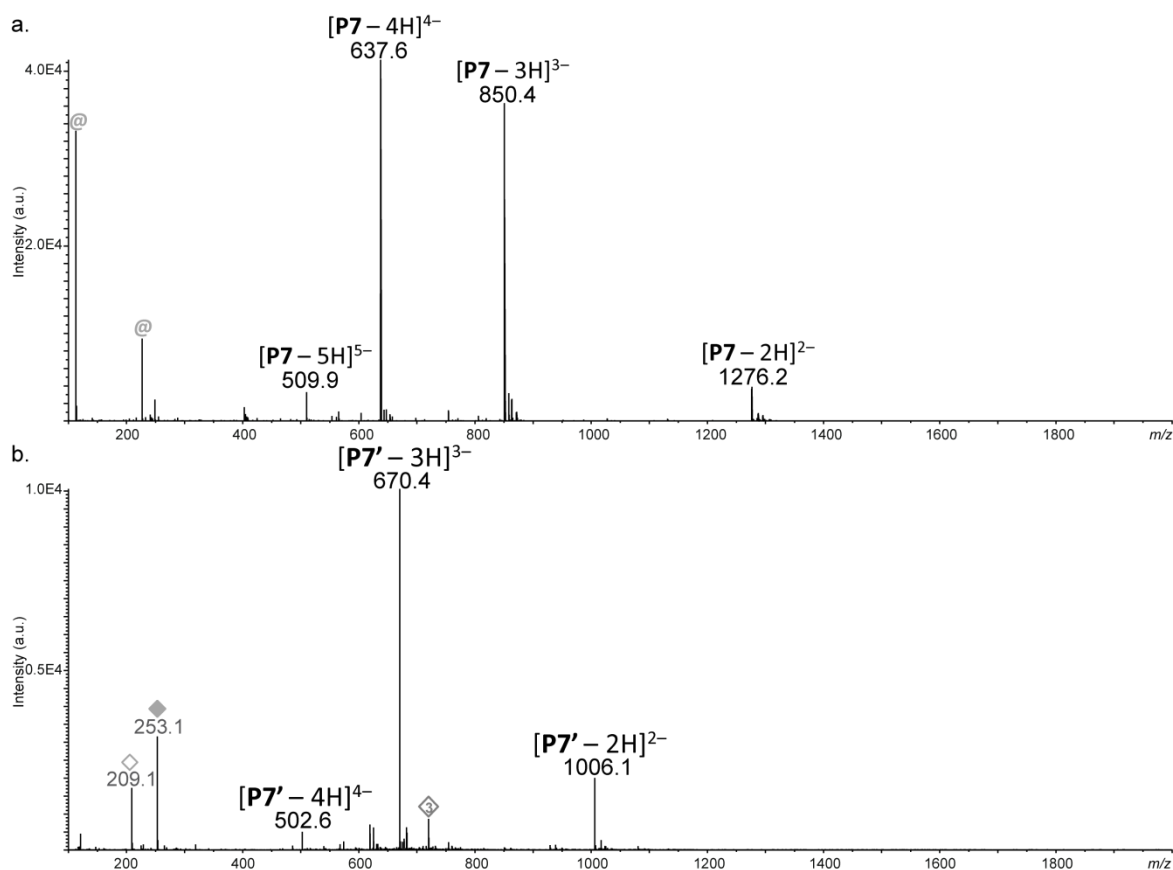

**Supplementary Figure 39.** ESI HRMS spectra recorded for (a) copolymer **P7** before irradiation and (b) the resulting polymer **P7'** after photo-exposure. Grey symbols designate clusters of trifluoroacetic acid (@) or photo-deprotection by-products (diamonds).

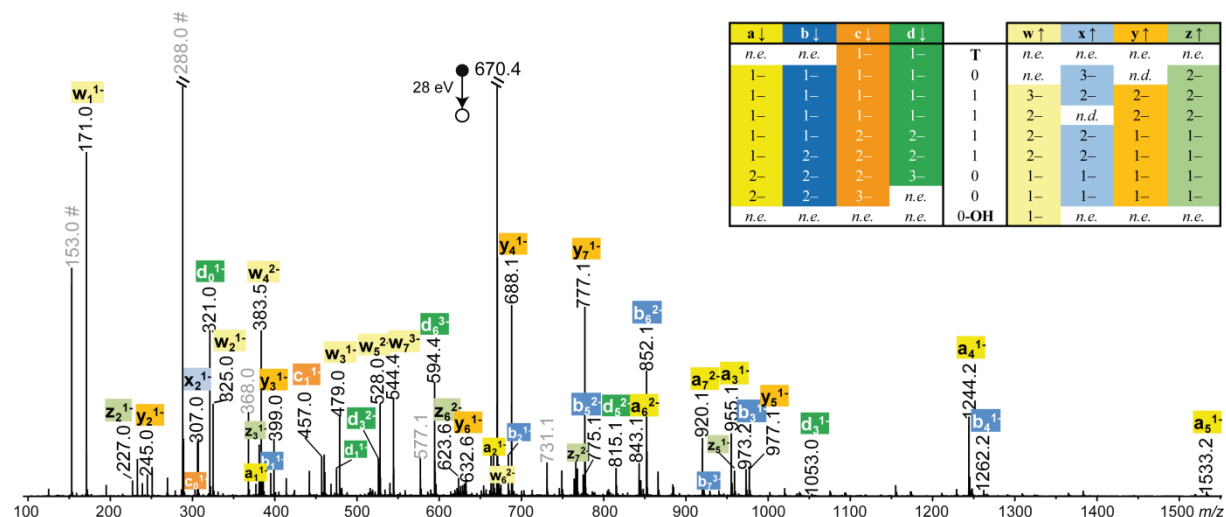

**Supplementary Figure 40.** MS/MS spectra recorded for copolymer **P7'** obtained after irradiation of **P7**, using a 28 eV collision energy (laboratory frame) to activate the triply deprotonated precursor at  $m/z$  670.4. Peaks annotated in grey correspond to secondary fragments, including the deprotonated units,  $[0 - \text{H}]^-$  at  $m/z$  153.0 and  $[1 - \text{H}]^-$  at  $m/z$  288.0, both designated by #. Inset Table: Sequence coverage of **P7'** (*n.d.*: not detected; *n.e.*: not expected). Before photo-exposure, copolymer **P7** exhibits the same MS/MS spectrum as **P10** in Supplementary Figure 35.

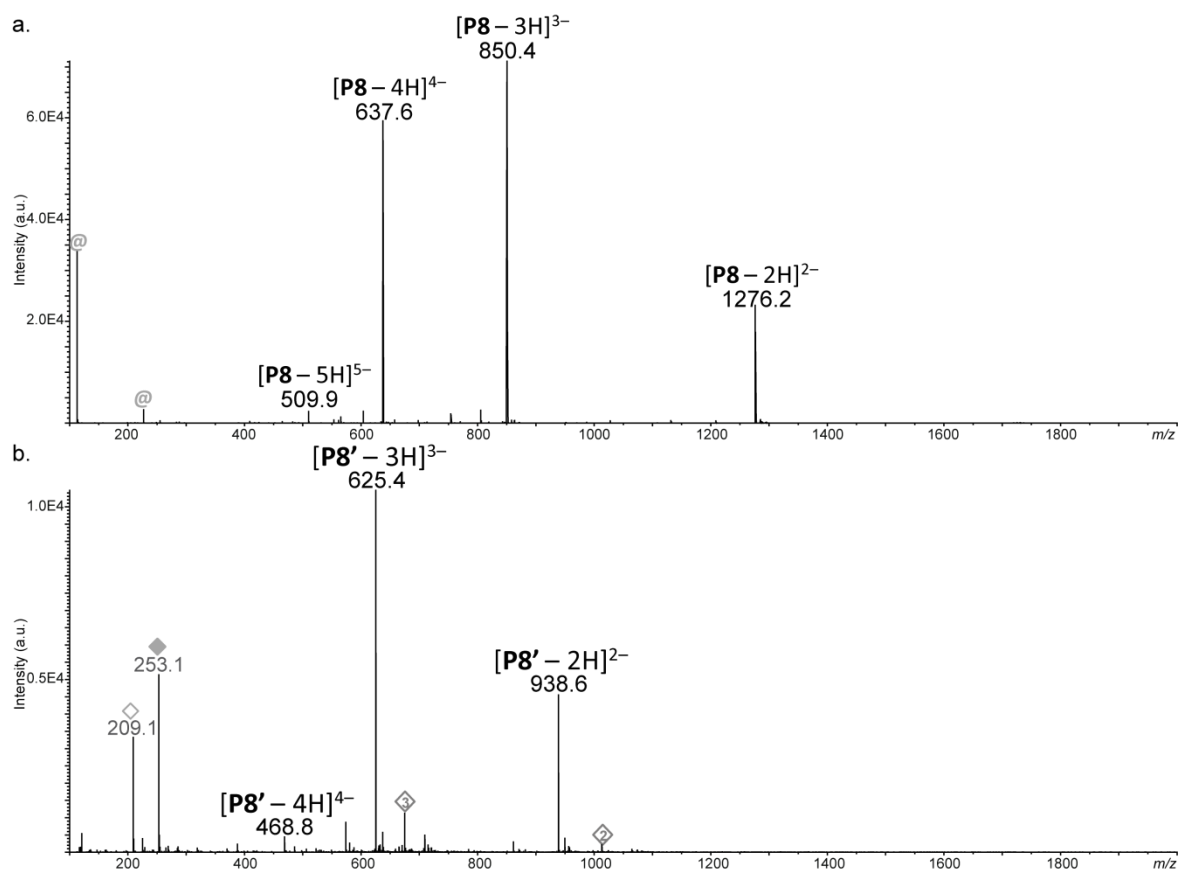

**Supplementary Figure 41.** ESI HRMS spectra recorded for (a) copolymer **P8** before irradiation and (b) the resulting polymer **P8'** after photo-exposure. Grey symbols designate clusters of trifluoroacetic acid (@) or photo-deprotection by-products (diamonds).

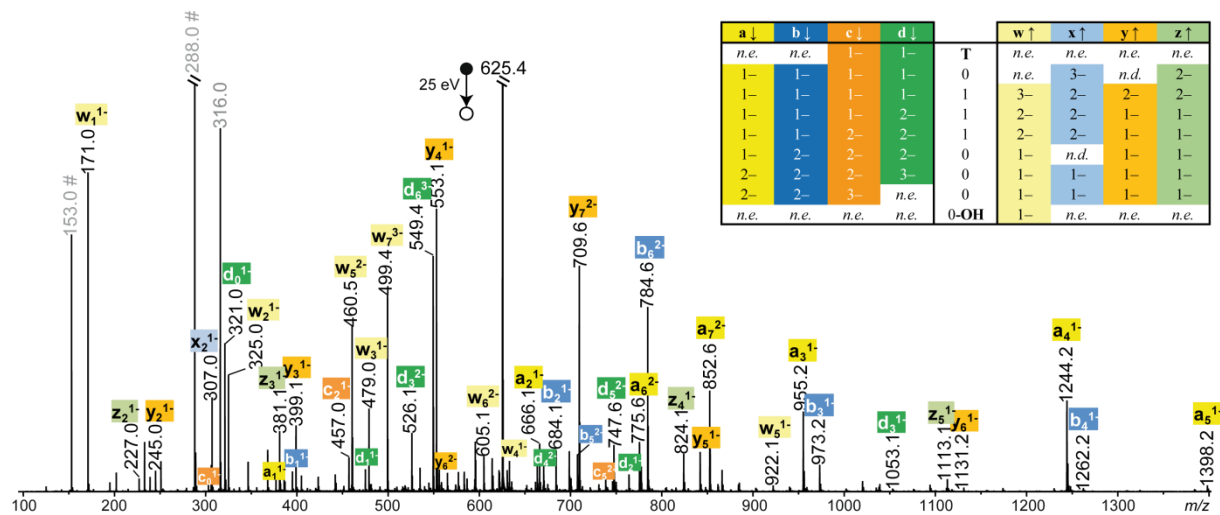

**Supplementary Figure 42.** MS/MS spectra recorded for copolymer **P8'** obtained after irradiation of **P8**, using a 25 eV collision energy (laboratory frame) to activate the triply deprotonated precursor at  $m/z$  625.4. Peaks annotated in grey correspond to secondary fragments, including the deprotonated units,  $[0 - \text{H}]^{-}$  at  $m/z$  153.0 and  $[1 - \text{H}]^{-}$  at  $m/z$  288.0, both designated by #. Inset Table: Sequence coverage of **P8'** (n.d.: not detected; n.e.: not expected). Before photo-exposure, copolymer **P8** exhibits the same MS/MS spectrum as **P10** in Supplementary Figure 35.





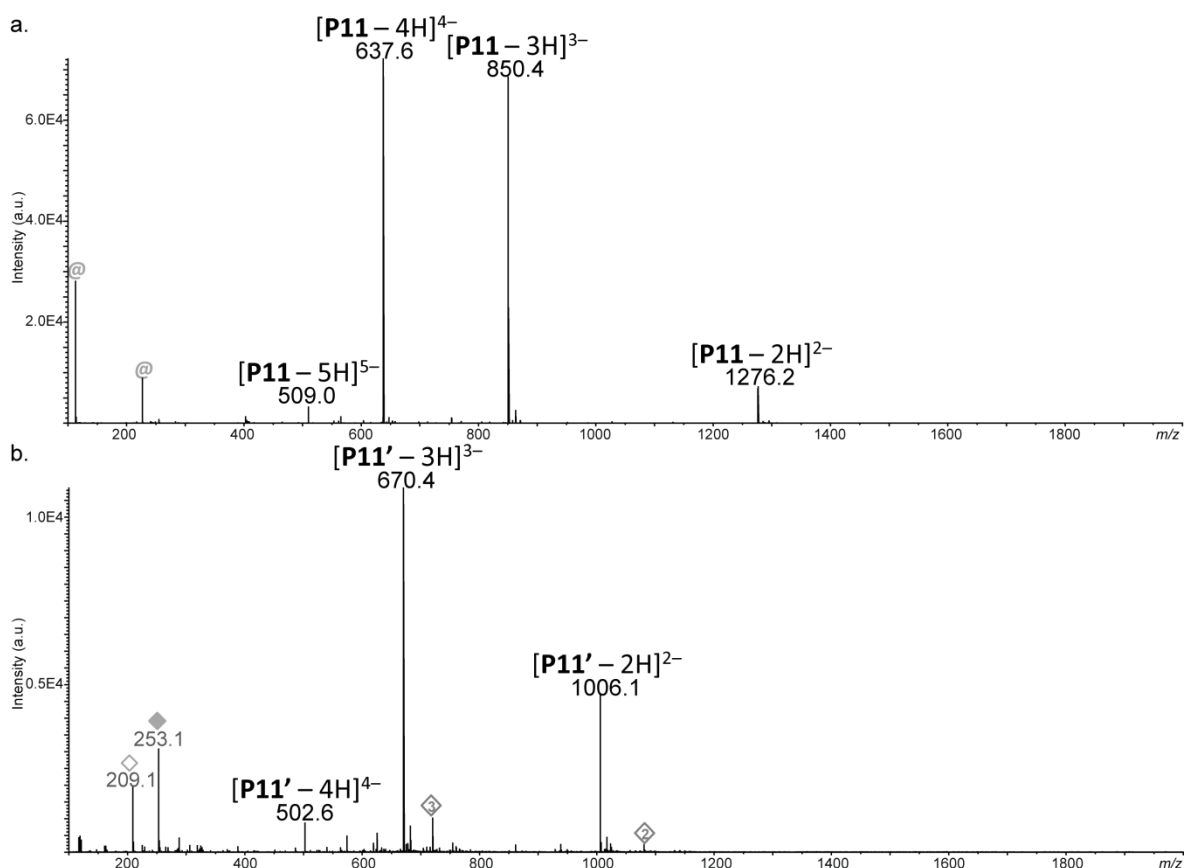

**Supplementary Figure 45.** ESI HRMS spectra recorded for (a) copolymer **P11** before irradiation and (b) the resulting polymer **P11'** after photo-exposure. Grey symbols designate clusters of trifluoroacetic acid (@) or photo-deprotection by-products (diamonds).

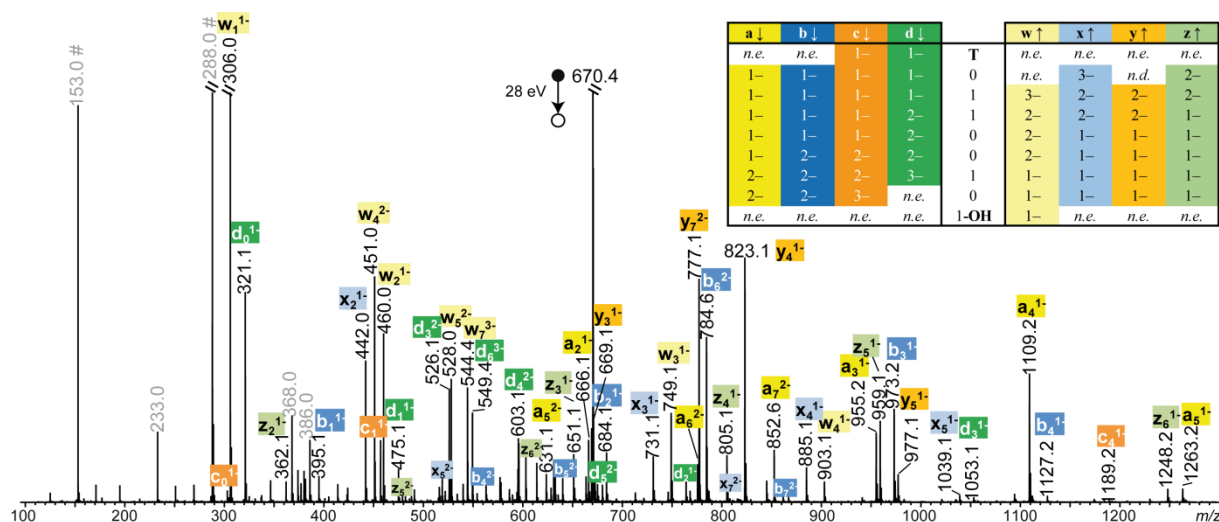

**Supplementary Figure 46.** MS/MS spectra recorded for copolymer **P11'** obtained after irradiation of **P11**, using a 28 eV collision energy (laboratory frame) to activate the triply deprotonated precursor at  $m/z$  670.4. Peaks annotated in grey correspond to secondary fragments, including the deprotonated units,  $[0 - \text{H}]^-$  at  $m/z$  153.0 and  $[1 - \text{H}]^-$  at  $m/z$  288.0, both designated by #. Inset Table: Sequence coverage of **P11'** (*n.d.*: not detected; *n.e.*: not expected). Before photo-exposure, copolymer **P11** exhibits the same MS/MS spectrum as **P10** in Supplementary Figure 35.

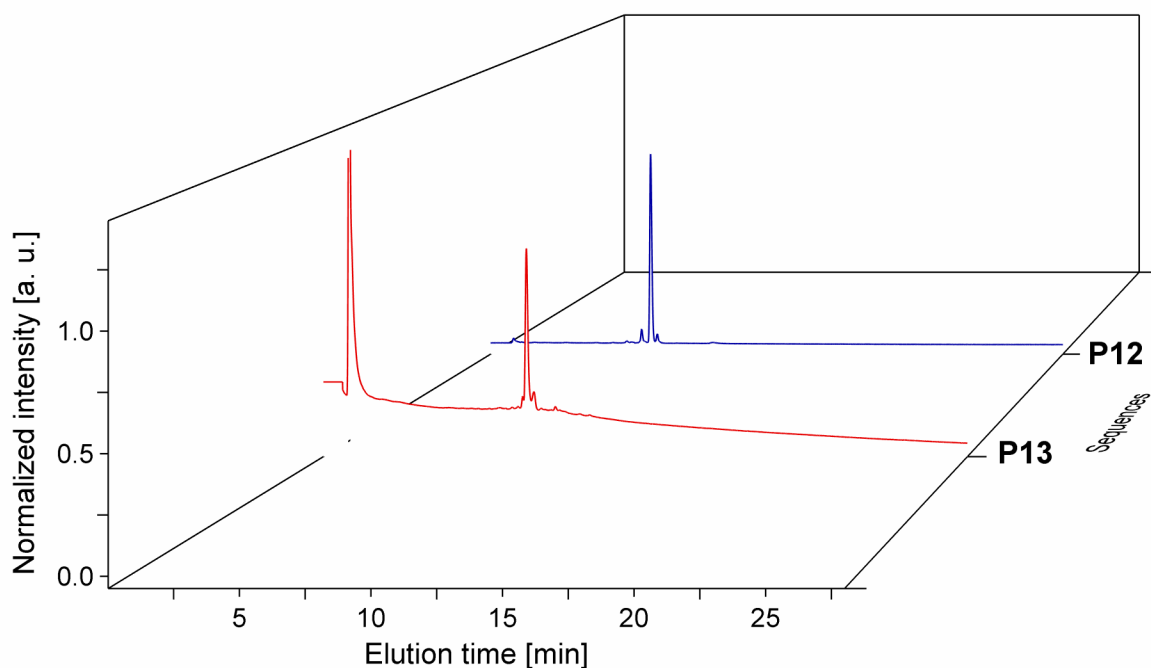

**Supplementary Figure 47.** HPLC traces measured for copolymers **P12** and **P13**. The chromatogram is recorded at  $\lambda=260$  nm. Experimental conditions: phase A: 10 % ACN 20 % 2M  $\text{NH}_3$  in water, phase B: 2.5 M NaCl in water; gradient: 0-3 min 5 % B, 3-23 min 5 % B-30 % B, 23-28 min 30 % B, 28-35 min 30%  $\rightarrow$  5 % B; flow rate:  $1 \text{ mL} \cdot \text{min}^{-1}$ .

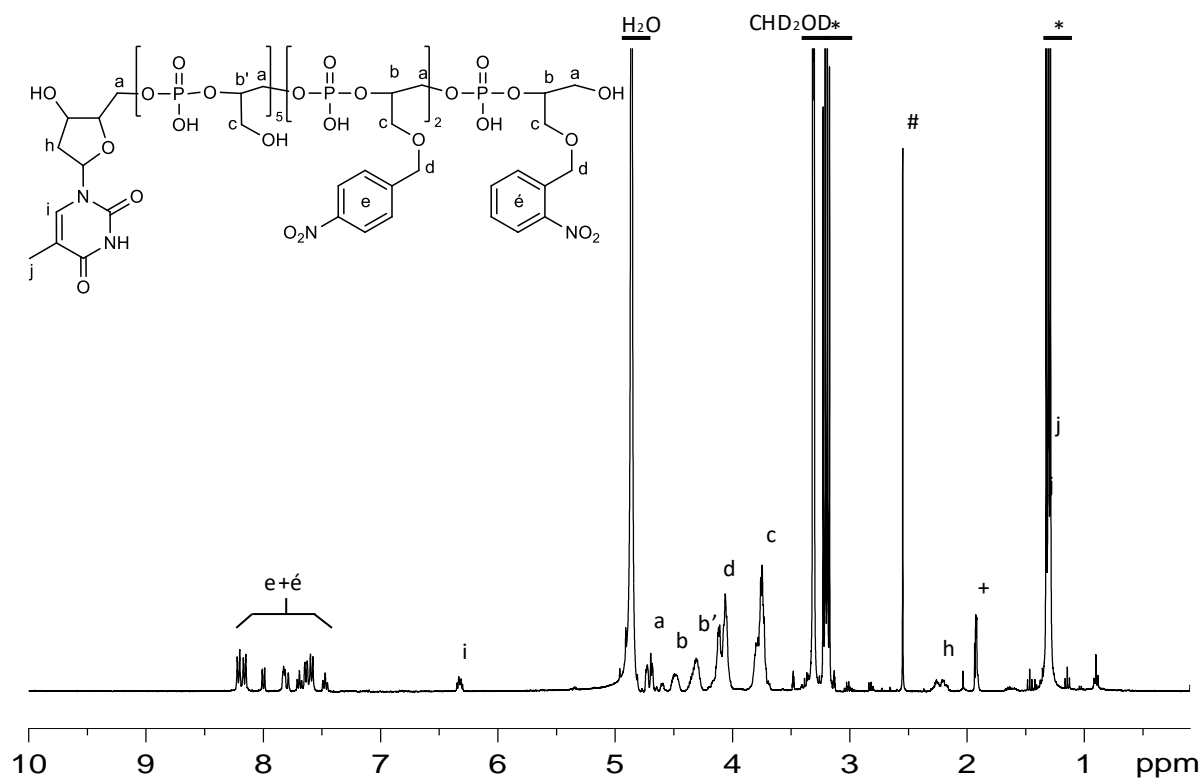

**Supplementary Figure 48.**  $^1\text{H}$  NMR spectrum recorded at RT in  $\text{CD}_3\text{OD}$  for copolymer **P12**. The star symbols indicate signals of triethylammonium counterions. (#) Methylamine, (+) acetonitrile.

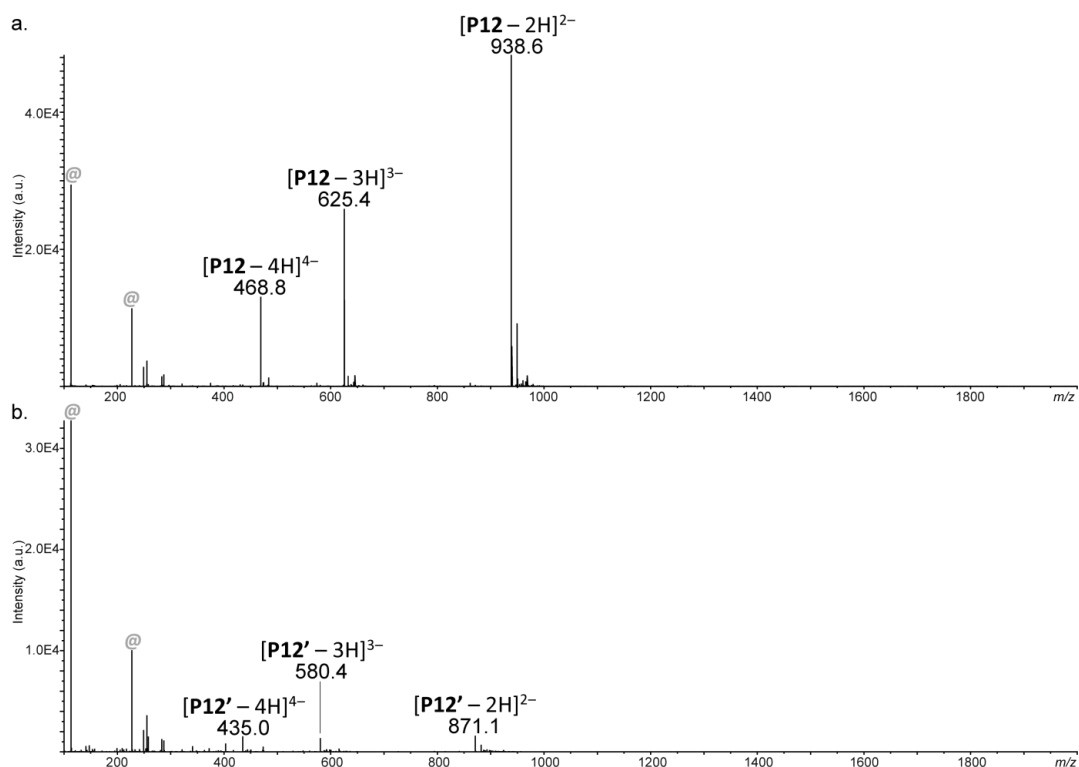

**Supplementary Figure 49.** ESI HRMS spectra recorded for (a) copolymer **P12** before irradiation and (b) the resulting polymer **P12'** after photo-exposure. Grey symbols indicate trifluoroacetic acid clusters (@).

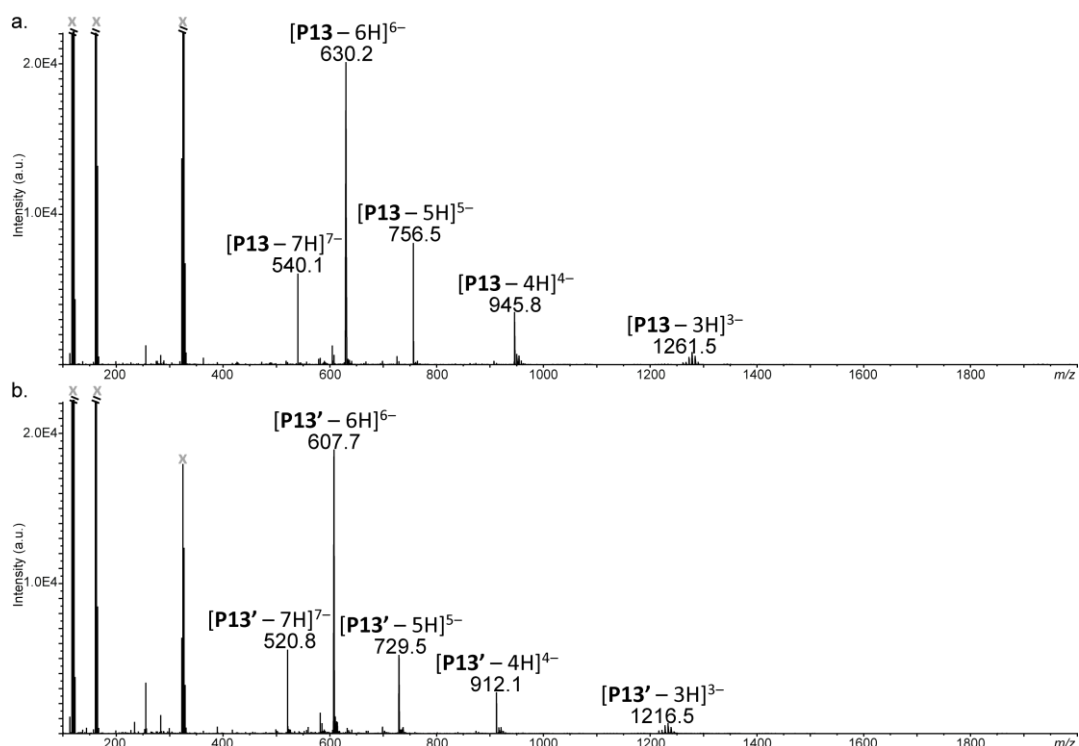

**Supplementary Figure 50.** ESI HRMS spectra recorded for (a) copolymer **P13** before irradiation and (b) the resulting polymer **P13'** after photo-exposure. Numerous H/Na exchanges in the lowest charge state species account for the more complex pattern observed for the 3<sup>-</sup> ions. Grey symbols designate clusters of trifluoroacetic acid (x).

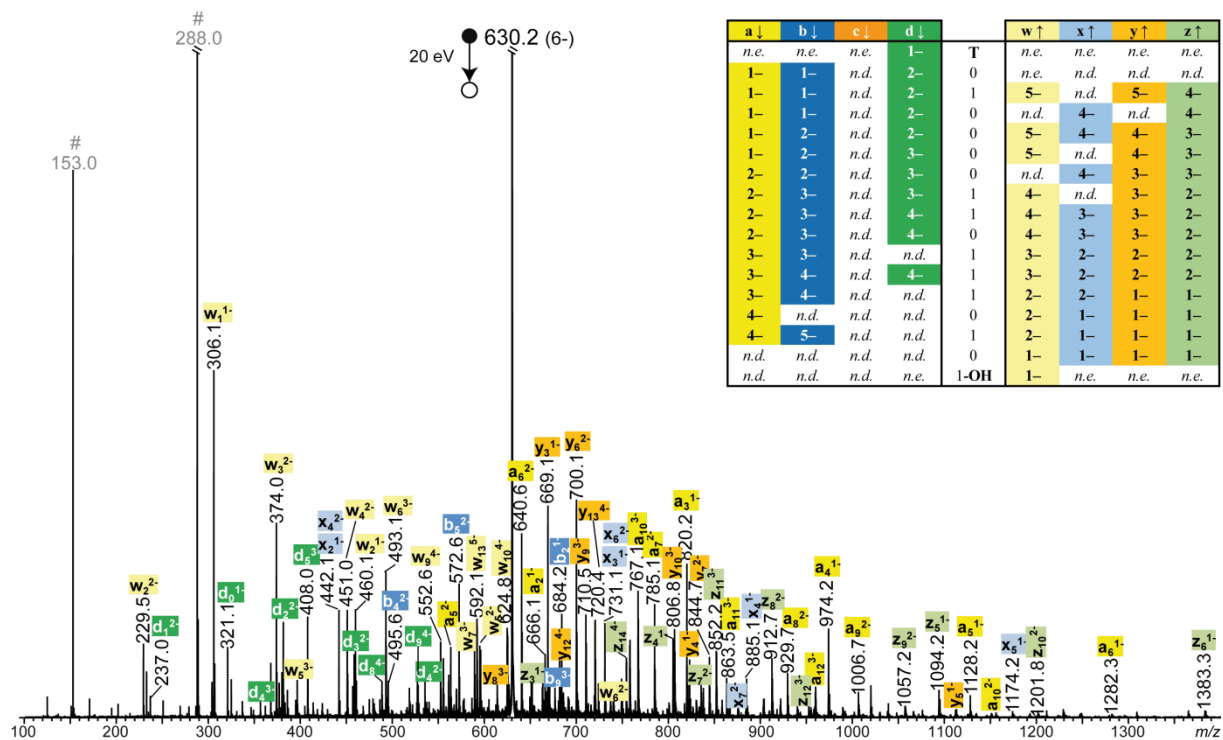

**Supplementary Figure 51.** MS/MS spectra recorded for copolymer **P13** before irradiation, using a 20 eV collision energy (laboratory frame) to activate the  $[\mathbf{P13} - 6\text{H}]^{6-}$  precursor at  $m/z$  630.2. In grey: secondary fragments, including the deprotonated units,  $[0 - \text{H}]^-$  at  $m/z$  153.0 and  $[1 - \text{H}]^-$  at  $m/z$  288.0, both designated by #. Inset Table: Sequence coverage of **P13** (*n.d.*: not detected; *n.e.*: not expected), with detailed assignments reported in Supplementary Table 7.

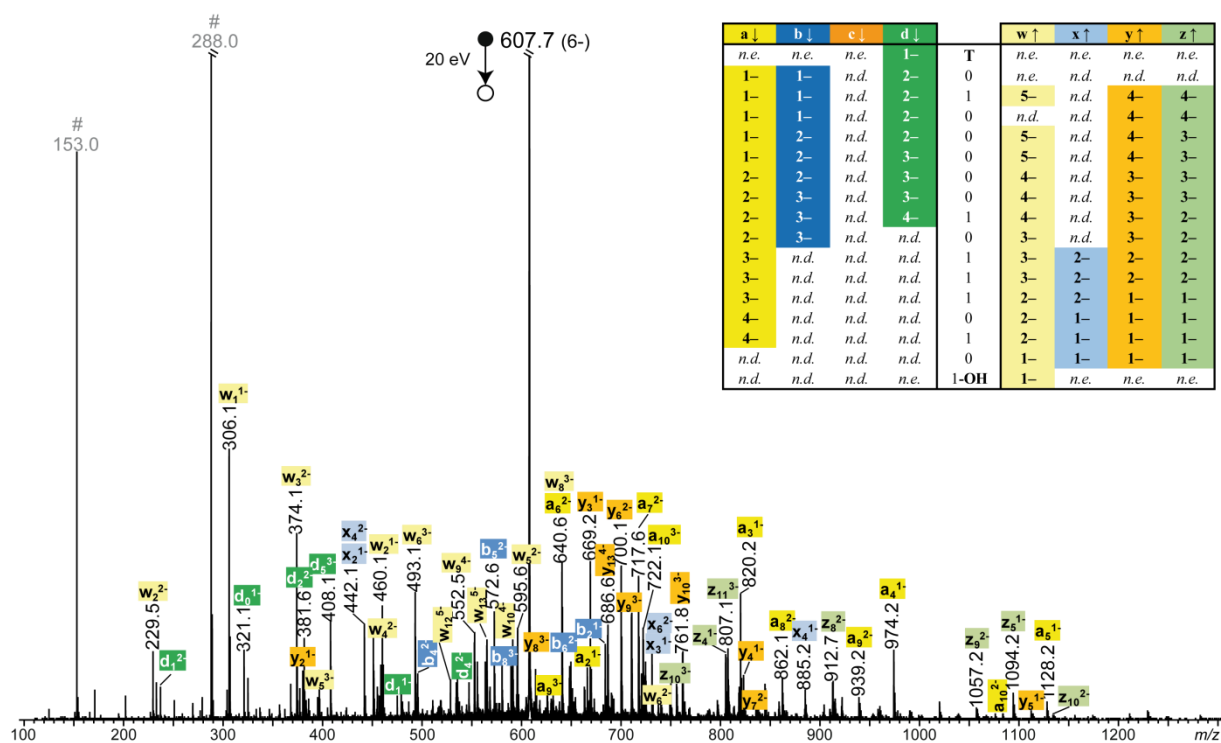

**Supplementary Figure 52.** MS/MS spectra recorded for copolymer **P13'** obtained after irradiation of **P13**, using a 20 eV collision energy (laboratory frame) to activate  $[\mathbf{P13}' - 6\text{H}]^{6-}$  at  $m/z$  607.7. In grey: secondary fragments, including the deprotonated units,  $[0 - \text{H}]^-$  at  $m/z$  153.0 and  $[1 - \text{H}]^-$  at  $m/z$  288.0, both designated by #. Inset Table: Sequence coverage of **P13'** (*n.d.*: not detected; *n.e.*: not expected), with detailed assignments reported in Supplementary Table 8.

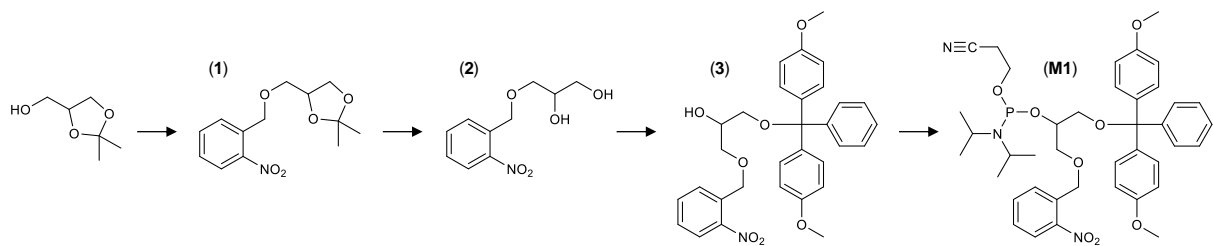

**Supplementary Figure 53.** Synthetic route used in this work for the preparation of **M1**.

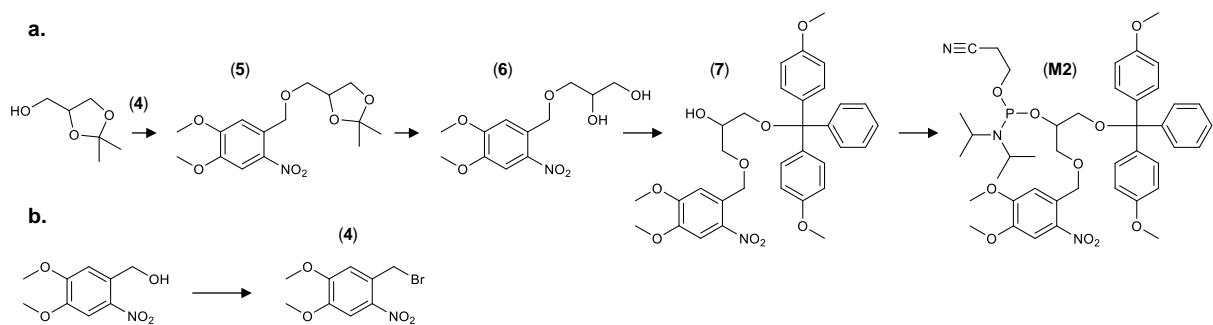

**Supplementary Figure 54.** Synthetic route used in this work for the preparation of **M2**: (a) main synthesis route; (b) synthesis of 4,5-dimethoxy-2-nitrobenzyl bromide.

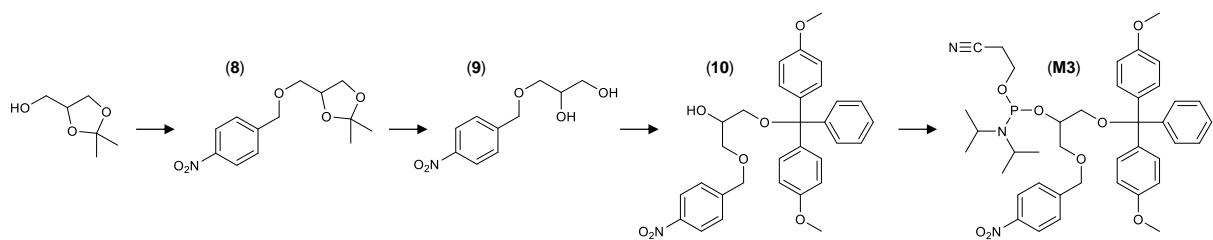

**Supplementary Figure 55.** Synthetic route used in this work for the preparation of **M3**.

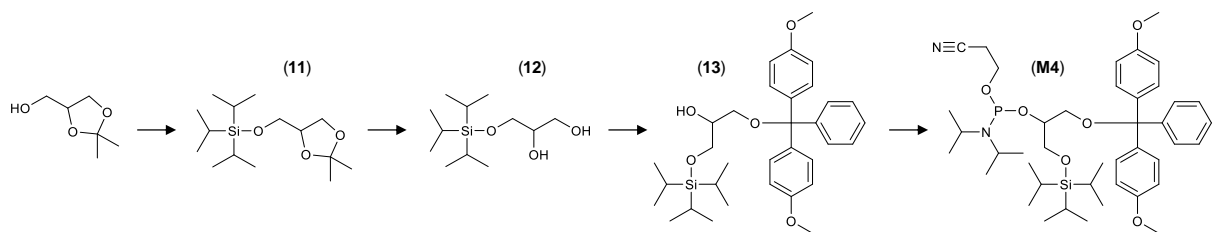

**Supplementary Figure 56.** Synthetic route used in this work for the preparation of **M4**.

## Supplementary Tables.

**Supplementary Table 1.** ESI-HRMS characterization of photo-erasable polymers.

| Before irradiation |                       |                         |             | After irradiation |                       |                         |                          |
|--------------------|-----------------------|-------------------------|-------------|-------------------|-----------------------|-------------------------|--------------------------|
|                    | Sequence <sup>a</sup> | $m/z_{th}$ <sup>b</sup> | $m/z_{exp}$ |                   | Sequence <sup>a</sup> | $m/z_{th}$ <sup>b</sup> | $m/z_{exp}$ <sup>c</sup> |
| <b>H1</b>          | T 00000000            | 850.4499                | 850.4451    | <b>H1'</b>        | T ●●●●●●●●            | 490.3644                | 490.3584                 |
| <b>H2</b>          | T 11111111            | 1010.5062               | 1010.5081   | <b>H2'</b>        | T ●●●●●●●●            | 490.3644                | <i>n.d.</i> <sup>d</sup> |
| <b>P1</b>          | T 01000101            | 910.4710                | 910.4710    | <b>P1'</b>        | T ●●●●●●●●            | 490.3644                | 490.3555                 |
| <b>P2</b>          | T 01110010            | 930.4780                | 930.4785    | <b>P2'</b>        | T ●●●●●●●●            | 490.3644                | 490.3559                 |
| <b>P3</b>          | T 01100001            | 910.4710                | 910.4711    | <b>P3'</b>        | T ●●●●●●●●            | 490.3644                | 490.3589                 |
| <b>P4</b>          | T 01110011            | 950.4851                | 950.4839    | <b>P4'</b>        | T ●●●●●●●●            | 490.3644                | 490.3585                 |
| <b>P5</b>          | T 01100101            | 930.4780                | 930.4795    | <b>P5'</b>        | T ●●●●●●●●            | 490.3644                | 490.3573                 |

<sup>a</sup> Before irradiation, bits 0 and 1 correspond to monomers **M1** and **M2**, respectively. After irradiation, the symbol ● represents the monomer unit of a non-decodable homopolymer. <sup>b</sup> The displayed  $m/z$  values correspond to  $[M-3H]^3$ . <sup>c</sup> After irradiation, targeted species were of too low abundance to allow high accuracy mass measurements, accounting for relative error of 10-20 ppm. <sup>d</sup> Due to its very low abundance, the triply deprotonated **H2'** polymer could not be accurately mass measured (*n.d.*: not determined).

**Supplementary Table 2.** ESI-HRMS characterization of polymers coded with an invisible ink.

| Before irradiation |                       |                         |             | After irradiation |                       |                         |             |
|--------------------|-----------------------|-------------------------|-------------|-------------------|-----------------------|-------------------------|-------------|
|                    | Sequence <sup>a</sup> | $m/z_{th}$ <sup>b</sup> | $m/z_{exp}$ |                   | Sequence <sup>a</sup> | $m/z_{th}$ <sup>b</sup> | $m/z_{exp}$ |
| <b>H3</b>          | T 11111111            | 850.4499                | 850.4520    | <b>H3'</b>        | T 11111111            | 850.4499                | 850.4484    |
| <b>P6</b>          | T 11111111            | 850.4499                | 850.4504    | <b>P6'</b>        | T 01000101            | 625.3965                | 625.3934    |
| <b>P7</b>          | T 11111111            | 850.4499                | 850.4527    | <b>P7'</b>        | T 01111000            | 670.4072                | 670.4061    |
| <b>P8</b>          | T 11111111            | 850.4499                | 850.4489    | <b>P8'</b>        | T 01110000            | 625.3965                | 625.3924    |
| <b>P9</b>          | T 11111111            | 850.4499                | 850.4538    | <b>P9'</b>        | T 01101111            | 760.4285                | 760.4254    |
| <b>P10</b>         | T 11111111            | 850.4499                | 850.4537    | <b>P10'</b>       | T 01110011            | 715.4178                | 715.4148    |
| <b>P11</b>         | T 11111111            | 850.4499                | 850.4522    | <b>P11'</b>       | T 01100101            | 670.4072                | 670.4073    |

<sup>a</sup> Before irradiation, 1 and 1 correspond to isobaric monomers **M1** and **M3**, respectively. After irradiation, bit 0 corresponds to a photo-deprotected **M1** unit. <sup>b</sup> The displayed  $m/z$  values correspond to  $[M-3H]^3$ .

**Supplementary Table 3.** ESI-HRMS characterization of photo-mutable polymers.

| Before irradiation |                       |                       |             | After irradiation |                       |                       |             |
|--------------------|-----------------------|-----------------------|-------------|-------------------|-----------------------|-----------------------|-------------|
|                    | Sequence <sup>a</sup> | $m/z_{th}$            | $m/z_{exp}$ |                   | Sequence <sup>a</sup> | $m/z_{th}$            | $m/z_{exp}$ |
| <b>P12</b>         | T 01000011            | 938.5983 <sup>b</sup> | 938.5995    | <b>P12'</b>       | T 01000010            | 871.0823 <sup>b</sup> | 871.0818    |
| <b>P13</b>         | T 0100001101110101    | 756.4726 <sup>c</sup> | 756.4720    | <b>P13'</b>       | T 0100000101110101    | 729.4662 <sup>c</sup> | 729.4660    |

<sup>a</sup> Before irradiation, 1 and 1 correspond to isobaric monomers **M1** and **M3**, respectively. Bit 0 corresponds to an OH-functional unit. <sup>b</sup> The displayed  $m/z$  values correspond to  $[M-2H]^2$ . <sup>c</sup> The displayed  $m/z$  values correspond to  $[M-5H]^5$ , measured at isotopic maximum.



**Supplementary Table 4.** Full coverage of the T01000101 sequence of **P1** using MS/MS data shown in Figure 2c.

| a ↓         | b ↓         | c ↓         | d ↓         |             | w ↑         | x ↑         | y ↑         | z ↑         |
|-------------|-------------|-------------|-------------|-------------|-------------|-------------|-------------|-------------|
| <i>n.e.</i> | <i>n.e.</i> | 1-          | 1-          | <b>T</b>    | <i>n.e.</i> | <i>n.e.</i> | <i>n.e.</i> | <i>n.e.</i> |
| 1-          | 1-          | 1-          | 2-          | 0           | <i>n.e.</i> | <i>n.d.</i> | 2-          | <i>n.d.</i> |
| 1-          | 1-          | <i>n.d.</i> | 2-          | 1           | 2-/3-       | 3-          | 2-          | 2-          |
| 1-          | 2-          | <i>n.d.</i> | <i>n.d.</i> | 0           | 2-/3-       | <i>n.d.</i> | 2-          | 2-          |
| 1-          | 2-          | <i>n.d.</i> | 3-          | 0           | 2-/3-       | 2-          | 1-/2-       | 1-          |
| 1-/2-       | 2-          | <i>n.d.</i> | <i>n.d.</i> | 0           | 2-          | <i>n.d.</i> | 1-          | 1-          |
| 2-          | 2-/3-       | <i>n.d.</i> | 3-/4-       | 1           | 1-/2-       | 1-          | 1-          | 1-          |
| 2-/3-       | <i>n.d.</i> | <i>n.d.</i> | <i>n.e.</i> | 0           | 1-/2-       | 1-          | 1-          | <i>n.d.</i> |
| <i>n.e.</i> | <i>n.e.</i> | <i>n.e.</i> | <i>n.e.</i> | <b>1-OH</b> | 1-          | <i>n.e.</i> | <i>n.e.</i> | <i>n.e.</i> |

Values indicate the fragment charge state. *n.d.*: not detected. *n.e.*: not expected.

**Supplementary Table 5.** Full coverage of the T01110011 sequence of **P10'** using MS/MS data shown in Figure 3c.

| a ↓         | b ↓         | c ↓         | d ↓         |             | w ↑         | x ↑         | y ↑         | z ↑         |
|-------------|-------------|-------------|-------------|-------------|-------------|-------------|-------------|-------------|
| <i>n.e.</i> | <i>n.e.</i> | 1-          | 1-          | <b>T</b>    | <i>n.e.</i> | <i>n.e.</i> | <i>n.e.</i> | <i>n.e.</i> |
| 1-          | 1-          | 1-          | 1-          | 0           | <i>n.e.</i> | 3-          | <i>n.d.</i> | 2-          |
| 1-          | 1-          | 1-          | 1-          | 1           | 3-          | 2-          | 2-          | 2-          |
| 1-          | 1-          | 1-          | 2-          | 1           | 2-          | 2-          | 2-          | 1-          |
| 1-          | 1-          | 2-          | 2-          | 1           | 2-          | 1-          | 1-          | 1-          |
| 1-          | 2-          | 2-          | 2-          | 0           | 2-          | 1-          | 1-          | 1-          |
| 2-          | 2-          | 2-          | 3-          | 0           | 1-          | 1-          | 1-          | 1-          |
| 2-          | 2-          | 3-          | <i>n.e.</i> | 1           | 1-          | 1-          | 1-          | 1-          |
| <i>n.e.</i> | <i>n.e.</i> | <i>n.e.</i> | <i>n.e.</i> | <b>1-OH</b> | 1-          | <i>n.e.</i> | <i>n.e.</i> | <i>n.e.</i> |

Values indicate the fragment charge state. *n.d.*: not detected. *n.e.*: not expected.

**Supplementary Table 6.** MS/MS data allowing full coverage of the T0100001X sequence of **P12** (X = 1) and **P12'** (X = 0).<sup>a</sup>

|                                   | <b>T</b>            | <b>0</b>            | <b>1</b>             | <b>0</b>             | <b>0</b>             | <b>0</b>             | <b>0</b>             | <b>1</b>            | <b>X</b>            |                                   |
|-----------------------------------|---------------------|---------------------|----------------------|----------------------|----------------------|----------------------|----------------------|---------------------|---------------------|-----------------------------------|
| <b>i</b> →                        | 0                   | 1                   | 2                    | 3                    | 4                    | 5                    | 6                    | 7                   | 8                   |                                   |
| <b>a<sub>i</sub><sup>z-</sup></b> | <i>n.e.</i>         | <i>n.d.</i>         | 666.1 <sup>1-</sup>  | 820.2 <sup>1-</sup>  | 974.2 <sup>1-</sup>  | 1128.3 <sup>1-</sup> | 1282.3 <sup>1-</sup> | 785.2 <sup>2-</sup> | <i>n.e.</i>         |                                   |
| <b>b<sub>i</sub><sup>z-</sup></b> | <i>n.e.</i>         | 395.1 <sup>1-</sup> | 684.1 <sup>1-</sup>  | 838.2 <sup>1-</sup>  | 992.2 <sup>1-</sup>  | 1146.3 <sup>1-</sup> | 1300.3 <sup>1-</sup> | 794.2 <sup>2-</sup> | <i>n.e.</i>         |                                   |
| <b>c<sub>i</sub><sup>z-</sup></b> | <i>n.e.</i>         | 457.1 <sup>1-</sup> | 746.1 <sup>1-</sup>  | 900.2 <sup>1-</sup>  | 1054.2 <sup>1-</sup> | 1208.2 <sup>1-</sup> | 680.6 <sup>2-</sup>  | <i>n.d.</i>         | <i>n.e.</i>         |                                   |
| <b>d<sub>i</sub><sup>z-</sup></b> | 321.1 <sup>1-</sup> | 475.1 <sup>1-</sup> | 764.1 <sup>1-</sup>  | 918.2 <sup>1-</sup>  | 1072.2 <sup>1-</sup> | 1226.2 <sup>1-</sup> | 689.6 <sup>2-</sup>  | 834.5 <sup>2-</sup> | <i>n.e.</i>         |                                   |
|                                   |                     | 8                   | 7                    | 6                    | 5                    | 4                    | 3                    | 2                   | 1                   | ← <b>j</b>                        |
|                                   | <i>n.e.</i>         | <i>n.e.</i>         | 749.6 <sup>2-</sup>  | 1211.2 <sup>1-</sup> | 1057.2 <sup>1-</sup> | 903.2 <sup>1-</sup>  | 749.1 <sup>1-</sup>  | 595.1 <sup>1-</sup> | 306.1 <sup>1-</sup> |                                   |
|                                   | <i>n.e.</i>         | <i>n.e.</i>         | 682.1 <sup>2-</sup>  | 1076.2 <sup>1-</sup> | 922.1 <sup>1-</sup>  | 768.1 <sup>1-</sup>  | 614.1 <sup>1-</sup>  | 460.1 <sup>1-</sup> | 171.1 <sup>1-</sup> | <b>w<sub>j</sub><sup>z-</sup></b> |
|                                   | <i>n.e.</i>         | 817.6 <sup>2-</sup> | 1482.2 <sup>1-</sup> | 1193.2 <sup>1-</sup> | 1039.2 <sup>1-</sup> | 885.2 <sup>1-</sup>  | 731.1 <sup>1-</sup>  | 577.1 <sup>1-</sup> | <i>n.e.</i>         |                                   |
|                                   | <i>n.e.</i>         | 750.1 <sup>2-</sup> | 673.1 <sup>2-</sup>  | 1058.1 <sup>1-</sup> | 904.1 <sup>1-</sup>  | 750.1 <sup>1-</sup>  | 596.1 <sup>1-</sup>  | 442.1 <sup>1-</sup> | <i>n.e.</i>         | <b>x<sub>j</sub><sup>z-</sup></b> |
|                                   | <i>n.e.</i>         | <i>n.d.</i>         | 1420.2 <sup>1-</sup> | 1131.3 <sup>1-</sup> | 977.2 <sup>1-</sup>  | 823.2 <sup>1-</sup>  | 669.1 <sup>1-</sup>  | 515.1 <sup>1-</sup> | <i>n.e.</i>         |                                   |
|                                   | <i>n.e.</i>         | 719.1 <sup>2-</sup> | 1285.3 <sup>1-</sup> | 996.2 <sup>1-</sup>  | 842.2 <sup>1-</sup>  | 688.1 <sup>1-</sup>  | 534.1 <sup>1-</sup>  | 380.1 <sup>1-</sup> | <i>n.e.</i>         | <b>y<sub>j</sub><sup>z-</sup></b> |
|                                   | <i>n.e.</i>         | 777.6 <sup>2-</sup> | 1402.3 <sup>1-</sup> | 1113.3 <sup>1-</sup> | 959.2 <sup>1-</sup>  | 805.2 <sup>1-</sup>  | 651.1 <sup>1-</sup>  | 497.1 <sup>1-</sup> | <i>n.e.</i>         |                                   |
|                                   | <i>n.e.</i>         | 710.1 <sup>2-</sup> | 1267.3 <sup>1-</sup> | 978.1 <sup>1-</sup>  | 824.2 <sup>1-</sup>  | 670.1 <sup>1-</sup>  | 516.1 <sup>1-</sup>  | 362.1 <sup>1-</sup> | <i>n.e.</i>         | <b>z<sub>j</sub><sup>z-</sup></b> |

<sup>a</sup> For both polymers **P12** and **P12'**,  $\alpha$ -terminated fragments ( $a_i$ ,  $b_i$ ,  $c_i$ ,  $d_i$ ) are identical since, in these series, species containing all units including the last X one ( $a_8$ ,  $b_8$ ,  $c_8$ ,  $d_8$ ) are not expected to form (*n.e.*). In contrast,  $\omega$ -terminated fragments ( $w_j$ ,  $x_j$ ,  $y_j$ ,  $z_j$ ) all contain the X unit as this is the first unit when counting from the right- to the left-hand side: accordingly, these series are different when X=1 for **P12** ( $m/z$  values in black) or X=0 for **P12'** ( $m/z$  values in red), with a mass shift corresponding to  $m_1 - m_0 = 135$  Da.

*n.d.*: not detected.

**Supplementary Table 7.** MS/MS data allowing full coverage of the T0100001101110101 sequence of **P13**

(*n.e.*: not expected; *n.d.*: not detected).

| i↓ | $a_i^{z^-}$          | $b_i^{z^-}$         | $c_i^{z^-}$ | $d_i^{z^-}$         |             | $w_j^{z^-}$         | $x_j^{z^-}$         | $y_j^{z^-}$          | $z_j^{z^-}$          |    |
|----|----------------------|---------------------|-------------|---------------------|-------------|---------------------|---------------------|----------------------|----------------------|----|
| 0  | <i>n.e.</i>          | <i>n.e.</i>         | <i>n.e.</i> | 321.1 <sup>1-</sup> | <b>T</b>    | <i>n.e.</i>         | <i>n.e.</i>         | <i>n.e.</i>          | <i>n.e.</i>          |    |
| 1  | 377.1 <sup>1-</sup>  | 395.1 <sup>1-</sup> | <i>n.d.</i> | 237.0 <sup>2-</sup> | <b>0</b>    | <i>n.d.</i>         | <i>n.d.</i>         | <i>n.d.</i>          | <i>n.d.</i>          | 16 |
| 2  | 666.2 <sup>1-</sup>  | 684.2 <sup>1-</sup> | <i>n.d.</i> | 381.5 <sup>2-</sup> | <b>1</b>    | 680.7 <sup>5-</sup> | <i>n.d.</i>         | 664.7 <sup>5-</sup>  | 826.6 <sup>4-</sup>  | 15 |
| 3  | 820.2 <sup>1-</sup>  | 838.2 <sup>1-</sup> | <i>n.d.</i> | 458.6 <sup>2-</sup> | <b>0</b>    | <i>n.d.</i>         | 619.3 <sup>4-</sup> | <i>n.d.</i>          | 754.4 <sup>4-</sup>  | 14 |
| 4  | 974.2 <sup>1-</sup>  | 495.6 <sup>2-</sup> | <i>n.d.</i> | 535.6 <sup>2-</sup> | <b>0</b>    | 592.1 <sup>5-</sup> | 735.9 <sup>4-</sup> | 720.4 <sup>4-</sup>  | 954.8 <sup>3-</sup>  | 13 |
| 5  | 1128.2 <sup>1-</sup> | 572.6 <sup>2-</sup> | <i>n.d.</i> | 408.0 <sup>3-</sup> | <b>0</b>    | 561.3 <sup>5-</sup> | <i>n.d.</i>         | 681.9 <sup>4-</sup>  | 903.5 <sup>3-</sup>  | 12 |
| 6  | 640.6 <sup>2-</sup>  | 649.6 <sup>2-</sup> | <i>n.d.</i> | 459.4 <sup>3-</sup> | <b>0</b>    | <i>n.d.</i>         | 658.8 <sup>4-</sup> | 858.2 <sup>3-</sup>  | 852.2 <sup>3-</sup>  | 11 |
| 7  | 785.1 <sup>2-</sup>  | 529.1 <sup>3-</sup> | <i>n.d.</i> | 555.6 <sup>3-</sup> | <b>1</b>    | 624.8 <sup>4-</sup> | <i>n.d.</i>         | 806.8 <sup>3-</sup>  | 1201.8 <sup>2-</sup> | 10 |
| 8  | 929.7 <sup>2-</sup>  | 625.4 <sup>3-</sup> | <i>n.d.</i> | 488.8 <sup>4-</sup> | <b>1</b>    | 552.6 <sup>4-</sup> | 731.1 <sup>3-</sup> | 710.5 <sup>3-</sup>  | 1057.2 <sup>2-</sup> | 9  |
| 9  | 1006.7 <sup>2-</sup> | 676.8 <sup>3-</sup> | <i>n.d.</i> | 527.3 <sup>4-</sup> | <b>0</b>    | 480.3 <sup>4-</sup> | 634.7 <sup>3-</sup> | 614.1 <sup>3-</sup>  | 912.7 <sup>2-</sup>  | 8  |
| 10 | 767.1 <sup>3-</sup>  | 773.1 <sup>3-</sup> | <i>n.d.</i> | <i>n.d.</i>         | <b>1</b>    | 589.4 <sup>3-</sup> | 875.6 <sup>2-</sup> | 844.7 <sup>2-</sup>  | 835.7 <sup>2-</sup>  | 7  |
| 11 | 863.5 <sup>3-</sup>  | 651.8 <sup>4-</sup> | <i>n.d.</i> | 537.2 <sup>5-</sup> | <b>1</b>    | 493.1 <sup>3-</sup> | 731.1 <sup>2-</sup> | 700.1 <sup>2-</sup>  | 691.1 <sup>2-</sup>  | 6  |
| 12 | 959.8 <sup>3-</sup>  | 724.1 <sup>4-</sup> | <i>n.d.</i> | <i>n.d.</i>         | <b>1</b>    | 595.6 <sup>2-</sup> | 586.6 <sup>2-</sup> | 1112.2 <sup>1-</sup> | 1094.2 <sup>1-</sup> | 5  |
| 13 | 758.1 <sup>4-</sup>  | <i>n.d.</i>         | <i>n.d.</i> | <i>n.d.</i>         | <b>0</b>    | 451.0 <sup>2-</sup> | 885.1 <sup>1-</sup> | 823.2 <sup>1-</sup>  | 805.2 <sup>1-</sup>  | 4  |
| 14 | 830.4 <sup>4-</sup>  | 667.6 <sup>5-</sup> | <i>n.d.</i> | <i>n.d.</i>         | <b>1</b>    | 374.0 <sup>2-</sup> | 731.1 <sup>1-</sup> | 669.2 <sup>1-</sup>  | 651.1 <sup>1-</sup>  | 3  |
| 15 | <i>n.d.</i>          | <i>n.d.</i>         | <i>n.d.</i> | <i>n.d.</i>         | <b>0</b>    | 460.1 <sup>1-</sup> | 442.1 <sup>1-</sup> | 380.1 <sup>1-</sup>  | 362.1 <sup>1-</sup>  | 2  |
| 16 | <i>n.d.</i>          | <i>n.d.</i>         | <i>n.d.</i> | <i>n.e.</i>         | <b>1-OH</b> | 306.1 <sup>1-</sup> | <i>n.e.</i>         | <i>n.e.</i>          | <i>n.e.</i>          | 1  |

j↑

**Supplementary Table 8.** MS/MS data allowing full coverage of the T0100000101110101 sequence of **P13'** (*n.e.*: not expected; *n.d.*: not detected).

| i↓ | $a_i^{z^-}$          | $b_i^{z^-}$         | $c_i^{z^-}$ | $d_i^{z^-}$         |             | $w_j^{z^-}$         | $x_j^{z^-}$         | $y_j^{z^-}$          | $z_j^{z^-}$          |    |
|----|----------------------|---------------------|-------------|---------------------|-------------|---------------------|---------------------|----------------------|----------------------|----|
| 0  | <i>n.e.</i>          | <i>n.e.</i>         | <i>n.e.</i> | 321.1 <sup>1-</sup> | <b>T</b>    | <i>n.e.</i>         | <i>n.e.</i>         | <i>n.e.</i>          | <i>n.e.</i>          |    |
| 1  | 377.1 <sup>1-</sup>  | 395.1 <sup>1-</sup> | <i>n.d.</i> | 237.0 <sup>2-</sup> | <b>0</b>    | <i>n.d.</i>         | <i>n.d.</i>         | <i>n.d.</i>          | <i>n.d.</i>          | 16 |
| 2  | 666.2 <sup>1-</sup>  | 684.2 <sup>1-</sup> | <i>n.d.</i> | 381.5 <sup>2-</sup> | <b>1</b>    | 653.7 <sup>5-</sup> | <i>n.d.</i>         | 797.4 <sup>4-</sup>  | 792.9 <sup>4-</sup>  | 15 |
| 3  | 820.2 <sup>1-</sup>  | 838.2 <sup>1-</sup> | <i>n.d.</i> | 458.6 <sup>2-</sup> | <b>0</b>    | <i>n.d.</i>         | <i>n.d.</i>         | 725.1 <sup>4-</sup>  | 720.6 <sup>4-</sup>  | 14 |
| 4  | 974.2 <sup>1-</sup>  | 495.6 <sup>2-</sup> | <i>n.d.</i> | 535.6 <sup>2-</sup> | <b>0</b>    | 565.1 <sup>5-</sup> | <i>n.d.</i>         | 686.6 <sup>4-</sup>  | 909.8 <sup>3-</sup>  | 13 |
| 5  | 1128.2 <sup>1-</sup> | 572.6 <sup>2-</sup> | <i>n.d.</i> | 408.0 <sup>3-</sup> | <b>0</b>    | 534.2 <sup>5-</sup> | <i>n.d.</i>         | 648.1 <sup>4-</sup>  | 858.5 <sup>3-</sup>  | 12 |
| 6  | 640.6 <sup>2-</sup>  | 649.6 <sup>2-</sup> | <i>n.d.</i> | 459.4 <sup>3-</sup> | <b>0</b>    | 629.6 <sup>4-</sup> | <i>n.d.</i>         | 813.1 <sup>3-</sup>  | 807.1 <sup>3-</sup>  | 11 |
| 7  | 717.6 <sup>2-</sup>  | 484.3 <sup>3-</sup> | <i>n.d.</i> | 510.7 <sup>3-</sup> | <b>0</b>    | 691.1 <sup>4-</sup> | <i>n.d.</i>         | 761.8 <sup>3-</sup>  | 755.8 <sup>3-</sup>  | 10 |
| 8  | 862.1 <sup>2-</sup>  | 580.4 <sup>3-</sup> | <i>n.d.</i> | 455.1 <sup>4-</sup> | <b>1</b>    | 552.6 <sup>4-</sup> | <i>n.d.</i>         | 710.5 <sup>3-</sup>  | 1057.2 <sup>2-</sup> | 9  |
| 9  | 939.2 <sup>2-</sup>  | 631.7 <sup>3-</sup> | <i>n.d.</i> | <i>n.d.</i>         | <b>0</b>    | 480.3 <sup>4-</sup> | <i>n.d.</i>         | 614.1 <sup>3-</sup>  | 912.7 <sup>2-</sup>  | 8  |
| 10 | 722.1 <sup>3-</sup>  | <i>n.d.</i>         | <i>n.d.</i> | <i>n.d.</i>         | <b>1</b>    | 589.4 <sup>3-</sup> | 875.6 <sup>2-</sup> | 844.7 <sup>2-</sup>  | 835.5 <sup>2-</sup>  | 7  |
| 11 | 818.5 <sup>3-</sup>  | <i>n.d.</i>         | <i>n.d.</i> | <i>n.d.</i>         | <b>1</b>    | 493.1 <sup>3-</sup> | 731.1 <sup>2-</sup> | 700.1 <sup>2-</sup>  | 691.1 <sup>2-</sup>  | 6  |
| 12 | 914.8 <sup>3-</sup>  | <i>n.d.</i>         | <i>n.d.</i> | <i>n.d.</i>         | <b>1</b>    | 595.6 <sup>2-</sup> | 586.6 <sup>2-</sup> | 1112.3 <sup>1-</sup> | 1094.2 <sup>1-</sup> | 5  |
| 13 | 724.4 <sup>4-</sup>  | <i>n.d.</i>         | <i>n.d.</i> | <i>n.d.</i>         | <b>0</b>    | 451.0 <sup>2-</sup> | 885.1 <sup>1-</sup> | 823.2 <sup>1-</sup>  | 805.2 <sup>1-</sup>  | 4  |
| 14 | 796.6 <sup>4-</sup>  | <i>n.d.</i>         | <i>n.d.</i> | <i>n.d.</i>         | <b>1</b>    | 374.0 <sup>2-</sup> | 731.1 <sup>1-</sup> | 669.2 <sup>1-</sup>  | 651.1 <sup>1-</sup>  | 3  |
| 15 | <i>n.d.</i>          | <i>n.d.</i>         | <i>n.d.</i> | <i>n.d.</i>         | <b>0</b>    | 460.1 <sup>1-</sup> | 442.1 <sup>1-</sup> | 380.1 <sup>1-</sup>  | 362.1 <sup>1-</sup>  | 2  |
| 16 | <i>n.d.</i>          | <i>n.d.</i>         | <i>n.d.</i> | <i>n.e.</i>         | <b>1-OH</b> | 306.1 <sup>1-</sup> | <i>n.e.</i>         | <i>n.e.</i>          | <i>n.e.</i>          | 1  |

j↑

### Supplementary References.

- 1 Klán, P., Šolomek, T., Bochet, C. G., Blanc, A., Givens, R., Rubina, M., Popik, V., Kostikov, A. & Wirz, J. Photoremovable Protecting Groups in Chemistry and Biology: Reaction Mechanisms and Efficacy. *Chem. Rev.* **113**, 119-191 (2013).
- 2 Barltrop, J. A., Plant, P. J. & Schofield, P. Photosensitive protective groups. *Chem. Commun.*, 822-823 (1966).
- 3 Patchornik, A., Amit, B. & Woodward, R. B. Photosensitive protecting groups. *J. Am. Chem. Soc.* **92**, 6333-6335 (1970).
- 4 Carré, P. Sur la décomposition de l'alcool ortho-nitrobenzylique sous l'influence de la soude aqueuse, et de la soude alcoolique. *C.R. Hebd. Seances Acad. Sci.* **140**, 663-665 (1905).
